# Supplementary material for: Microclimate monitoring in the Carcer Tullianum: temporal and spatial correlation and gradients evidenced by multivariate analysis; first campaign
Source: PubMed Central journal article supplement (PMC3342126; doi:10.1186/1752-153x-6-s2-s11), 2012-05-02
Supplement: 1752-153X-6-S2-S11-S1.pdf [file 1752-153X-6-S2-S11-S1.pdf]

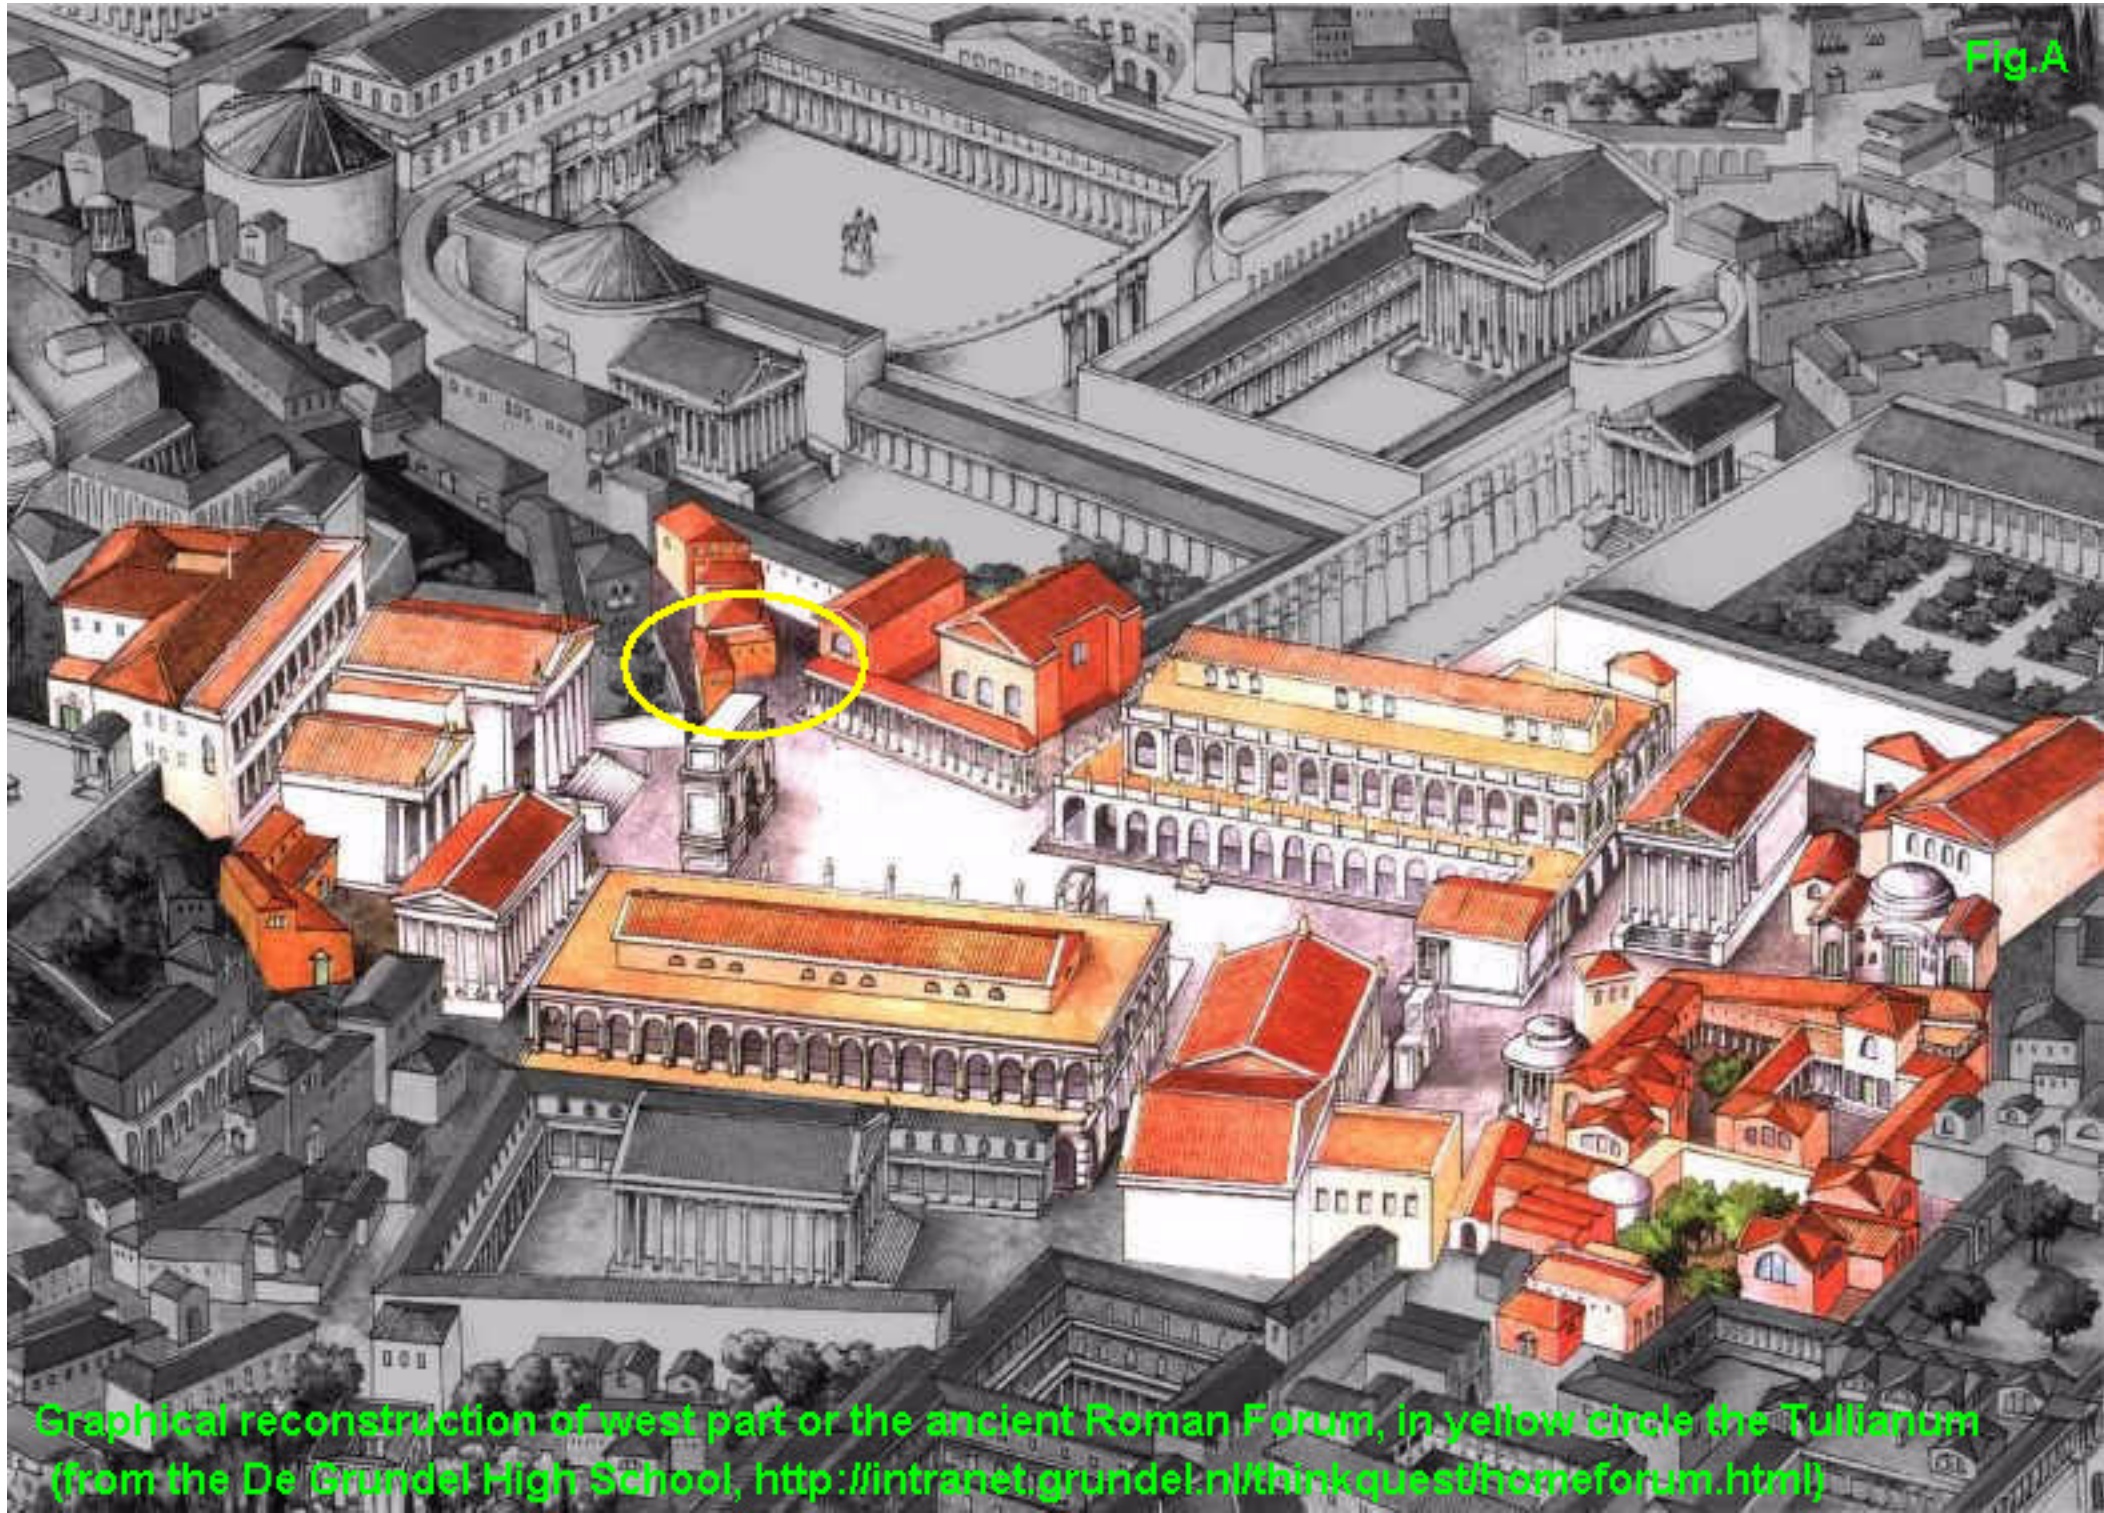

Graphical reconstruction of west part of the ancient Roman Forum, in yellow circle the Tullianum (from the De Grindel High School, <http://intranet.grindel.nl/thinkquest/homeforum.html>)





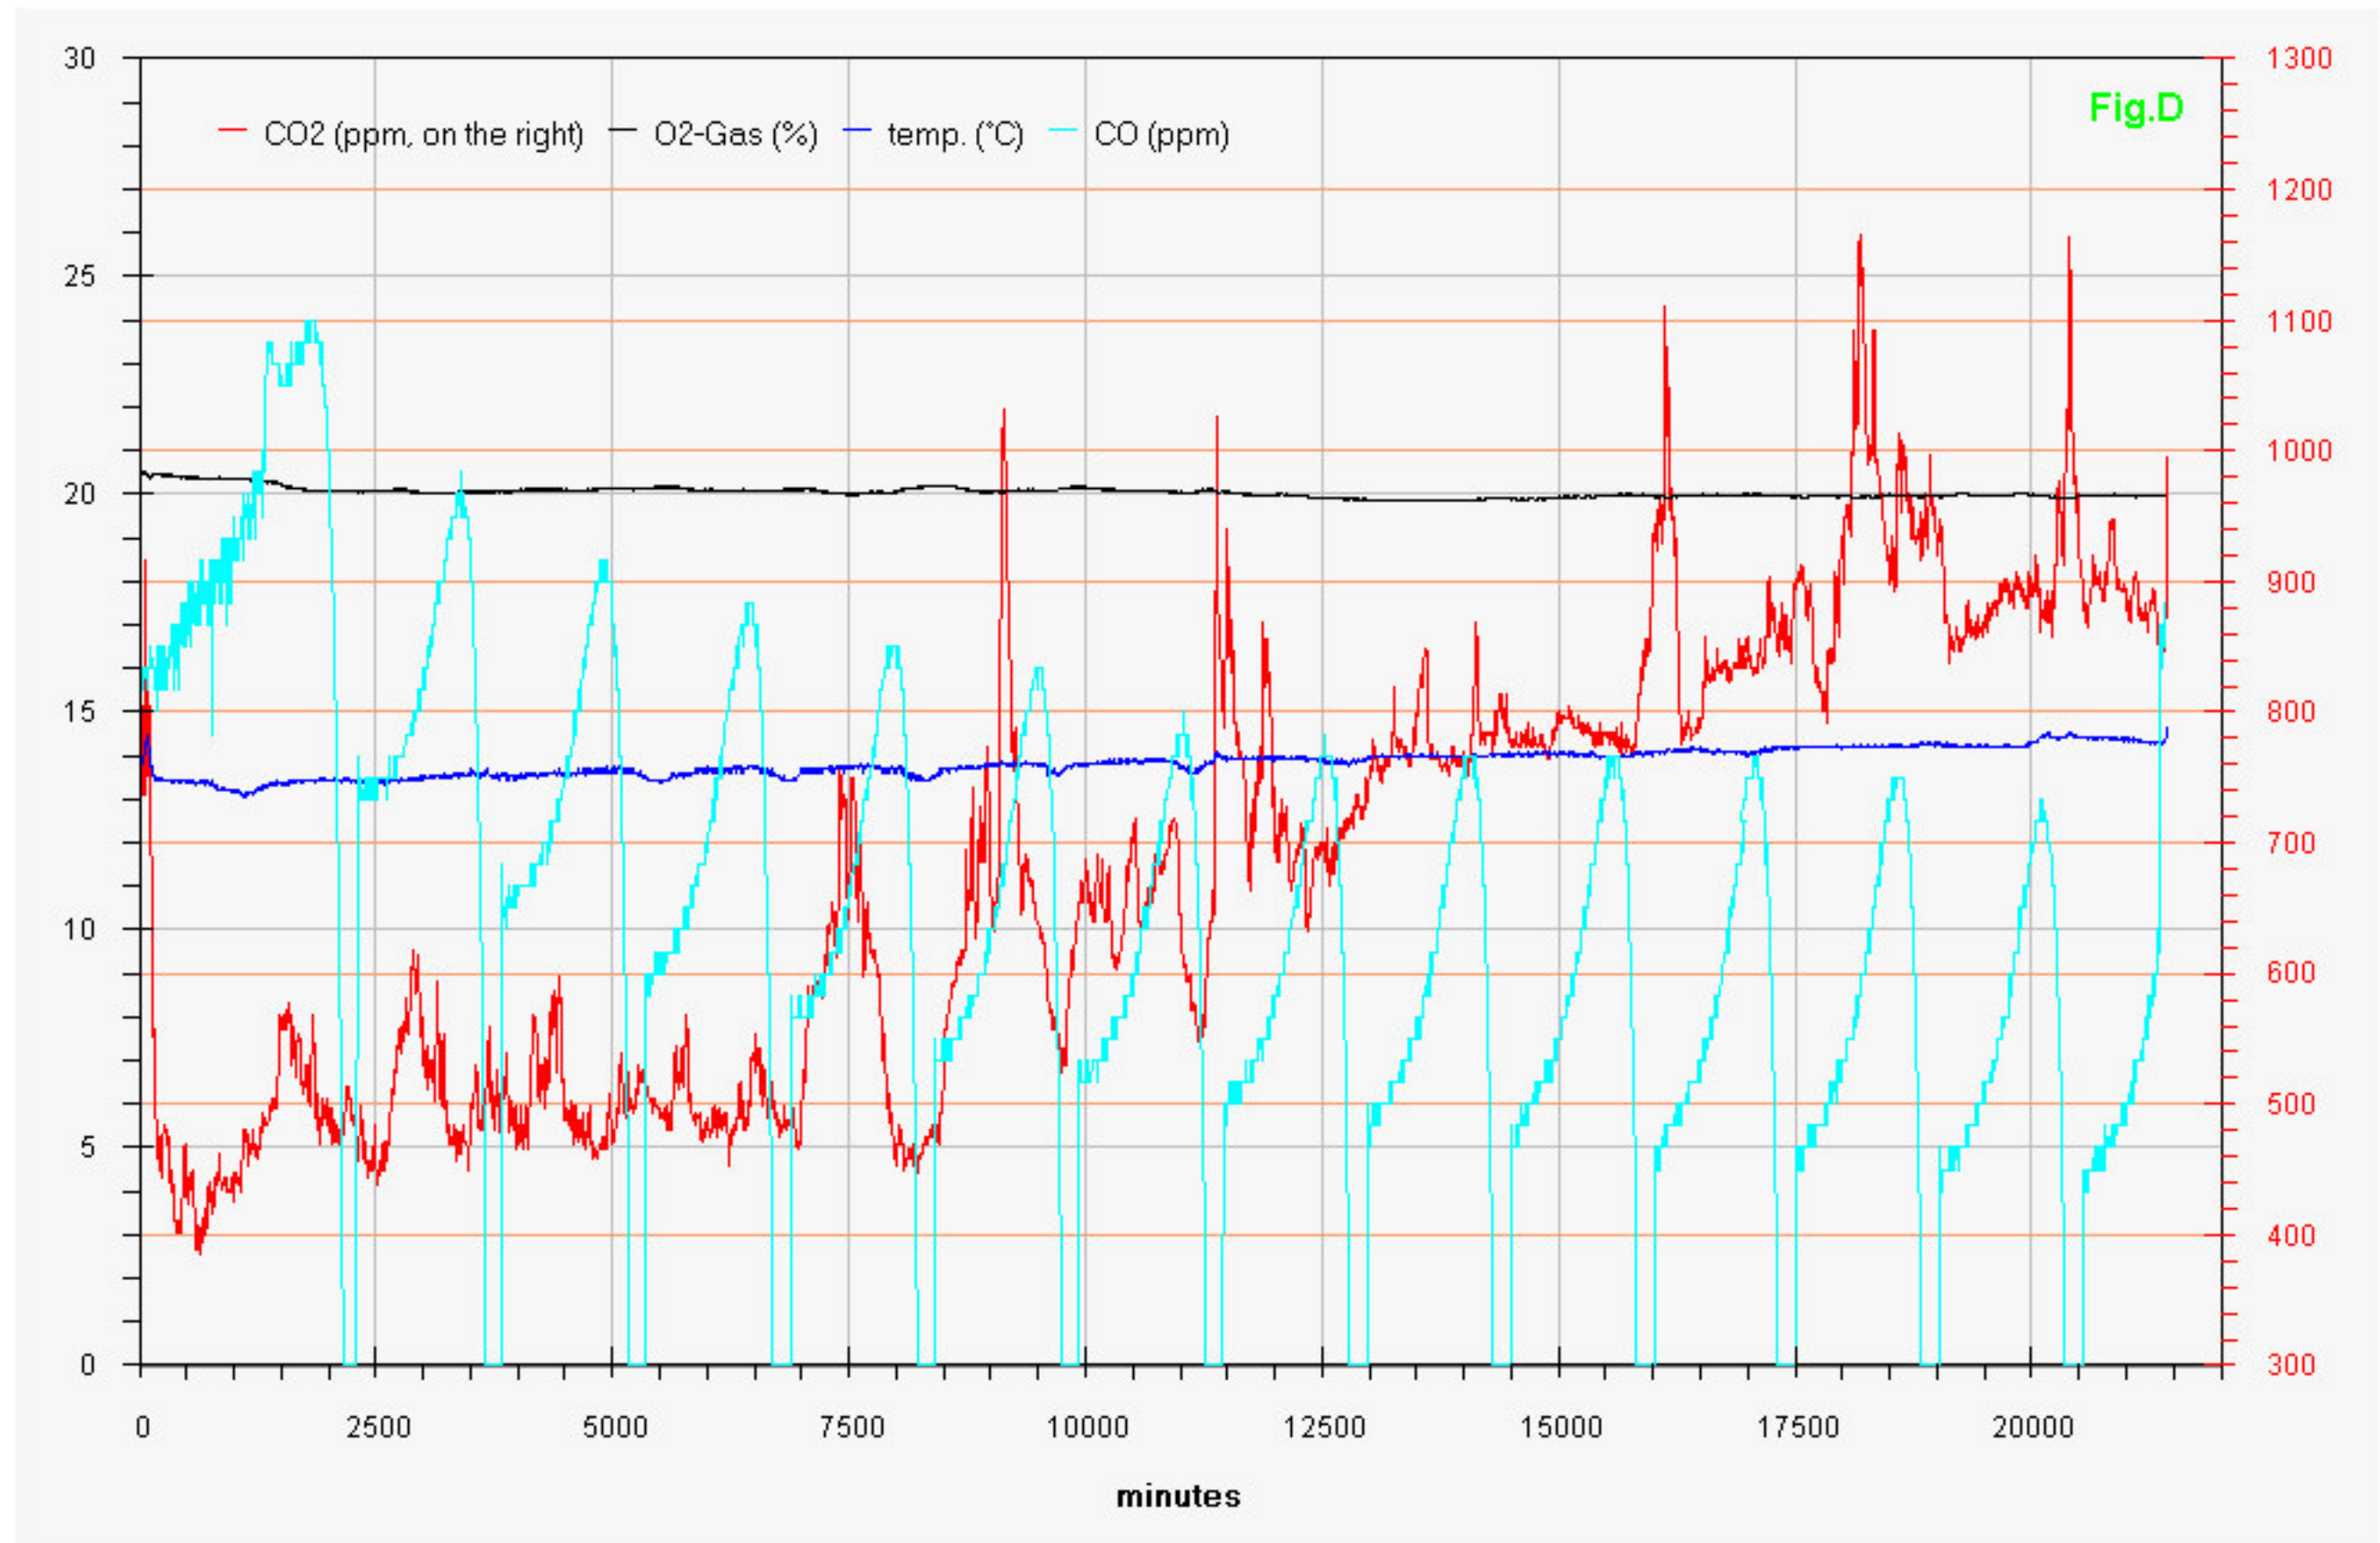

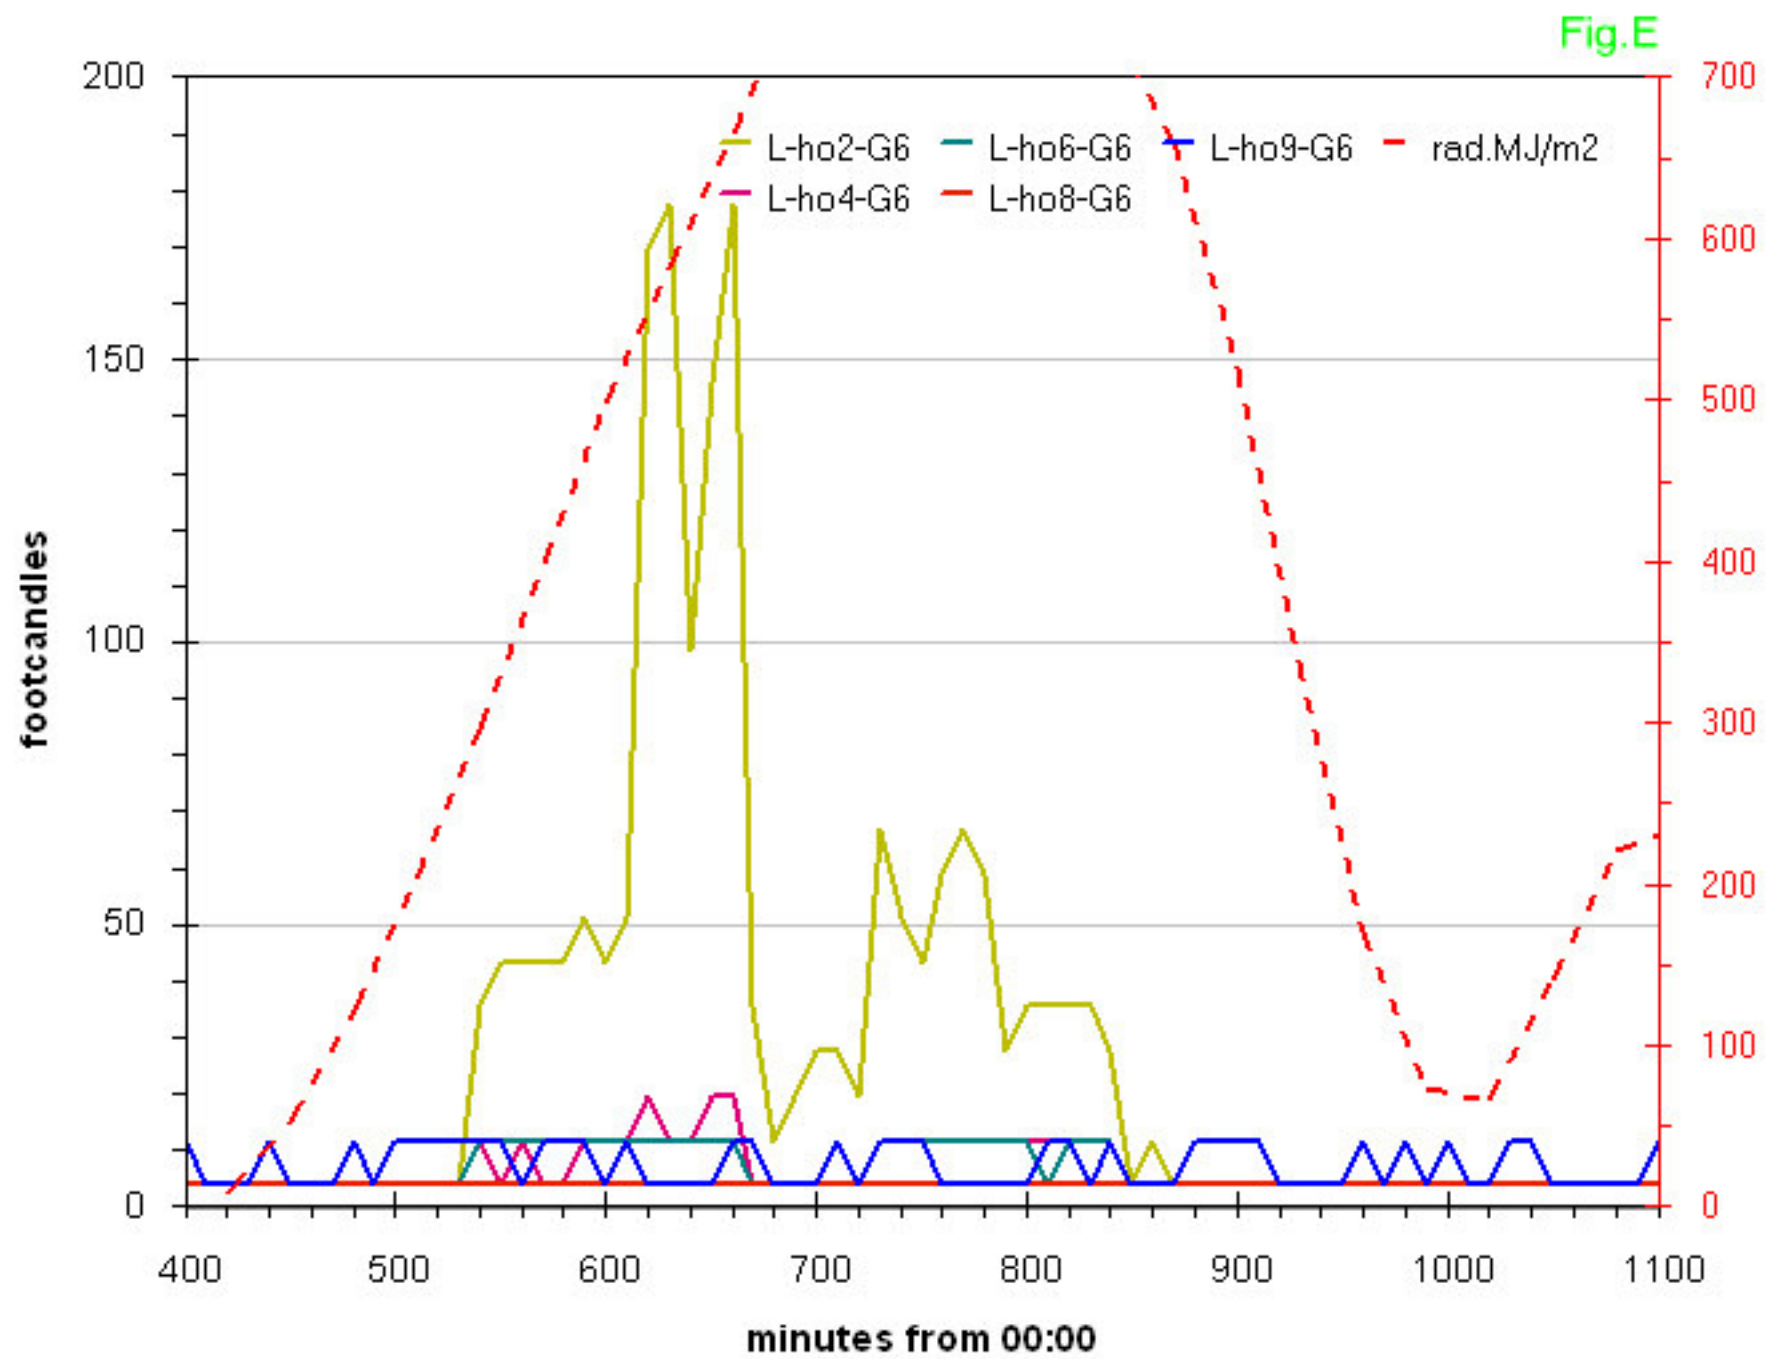

Fig.F

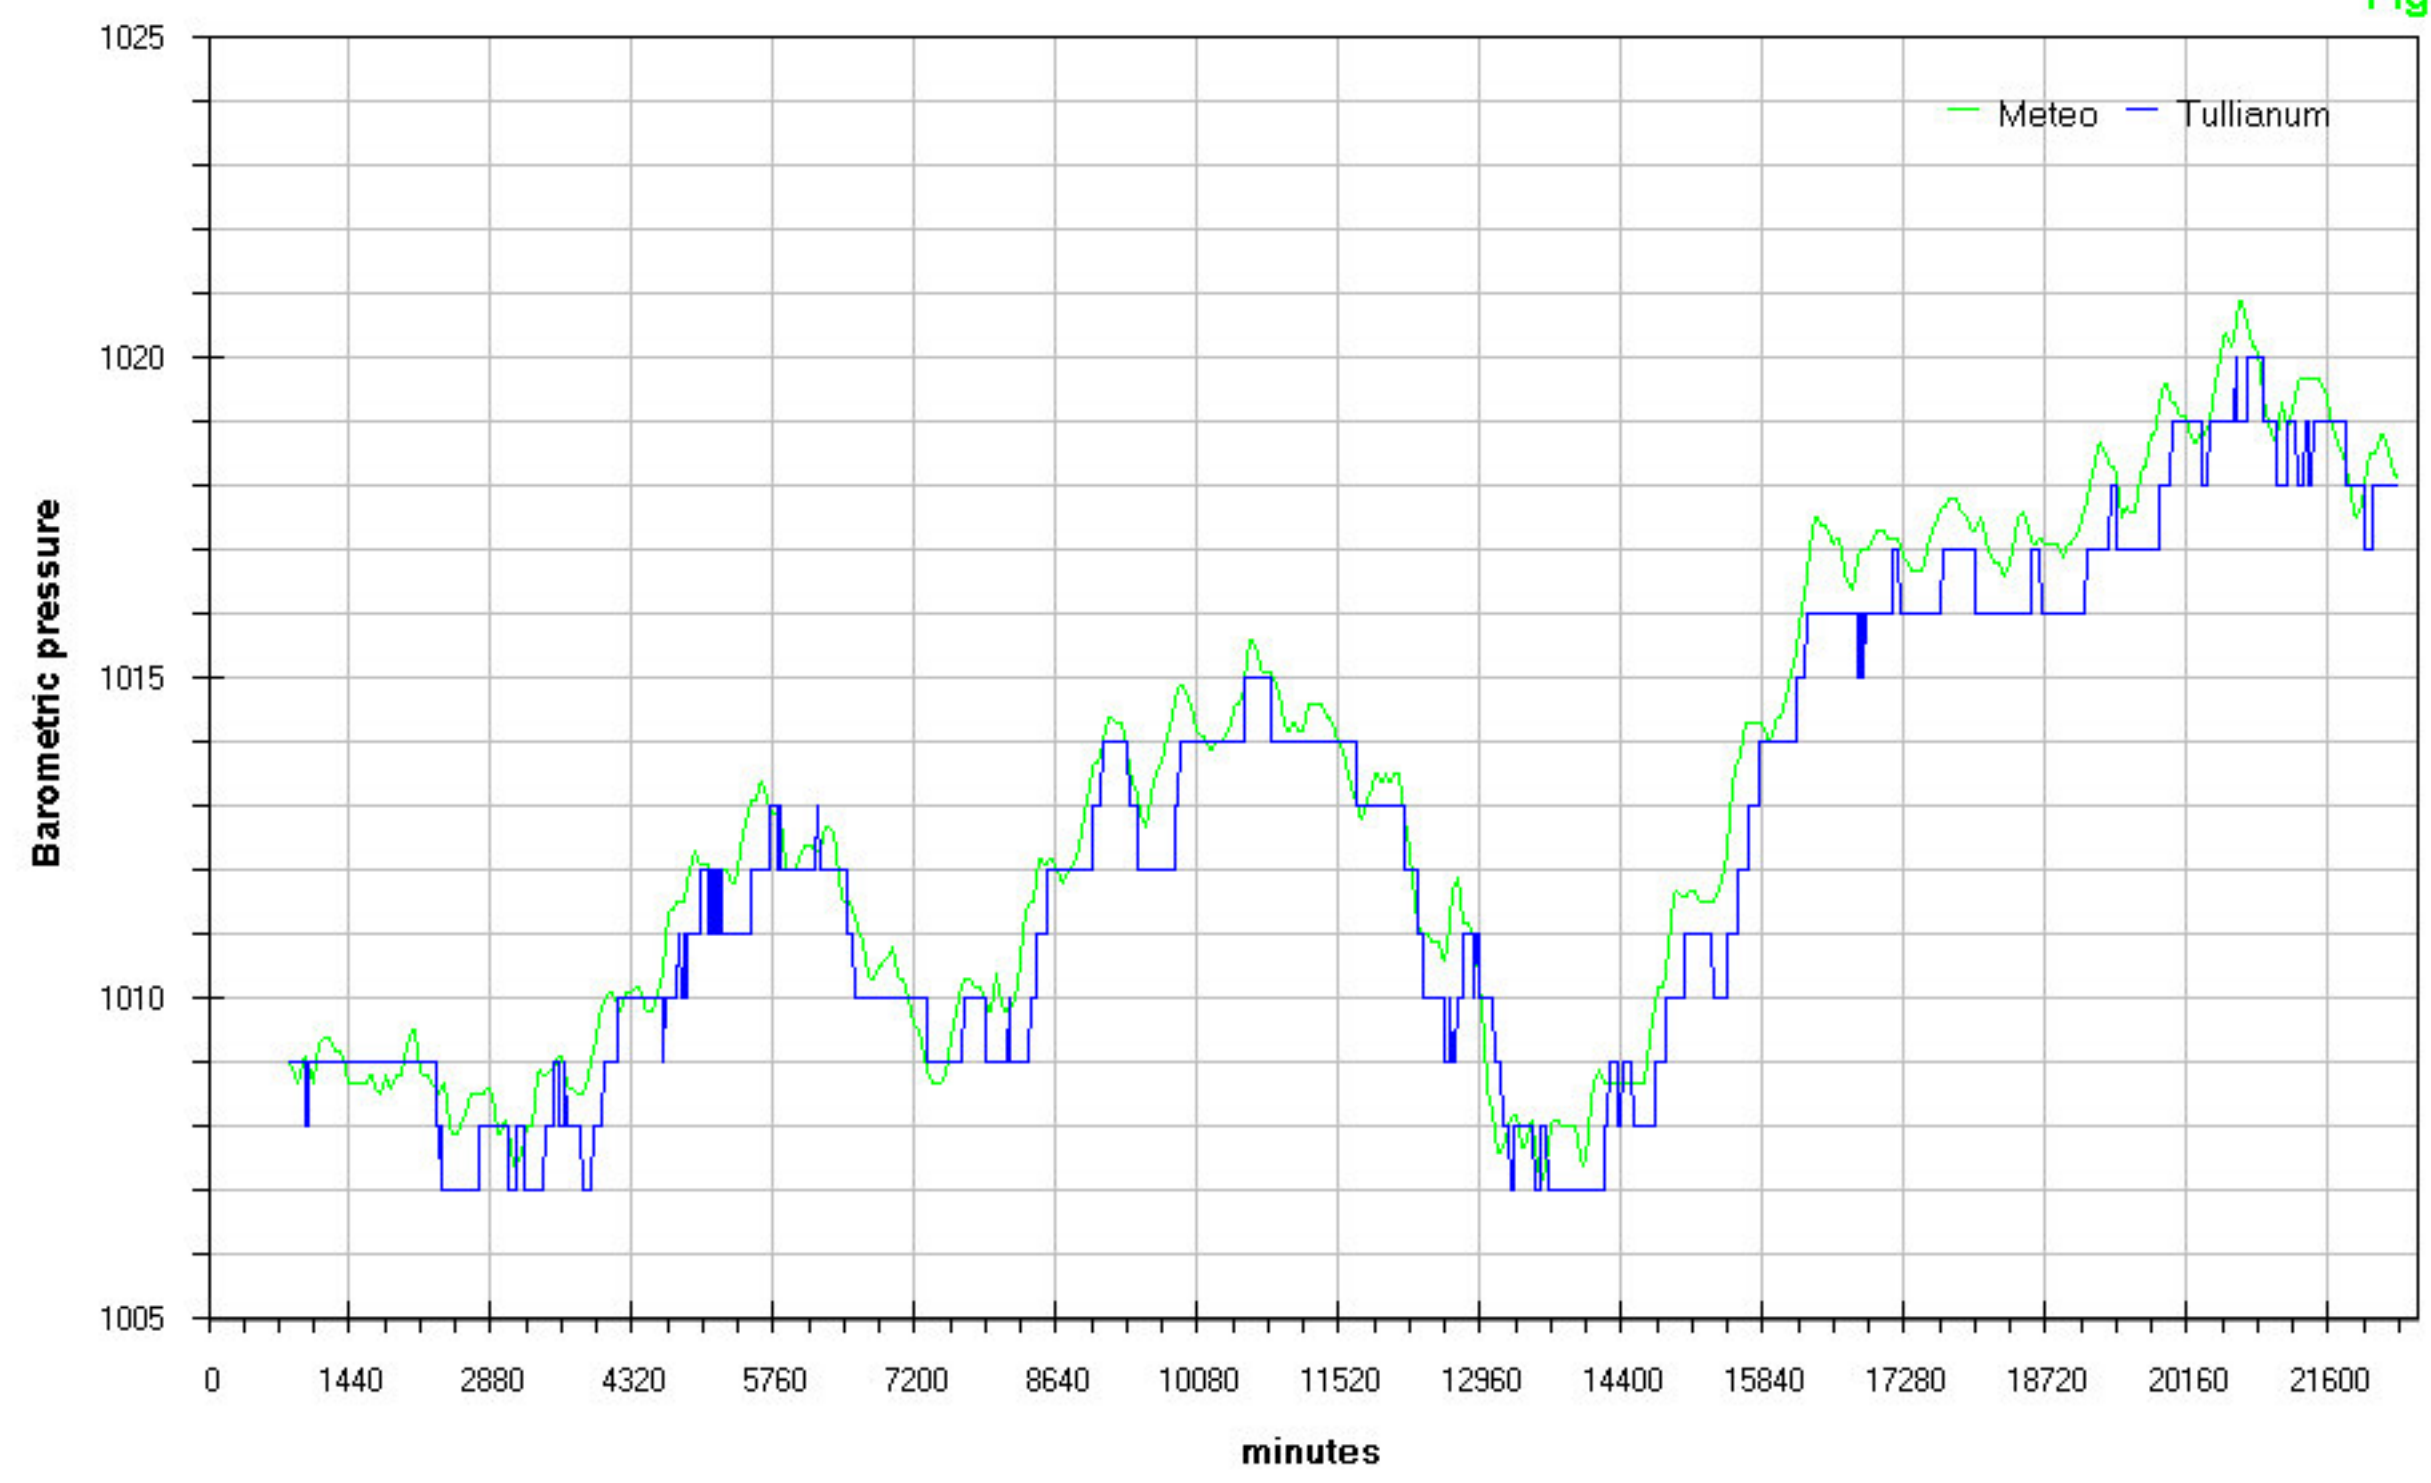

Fig.Ga

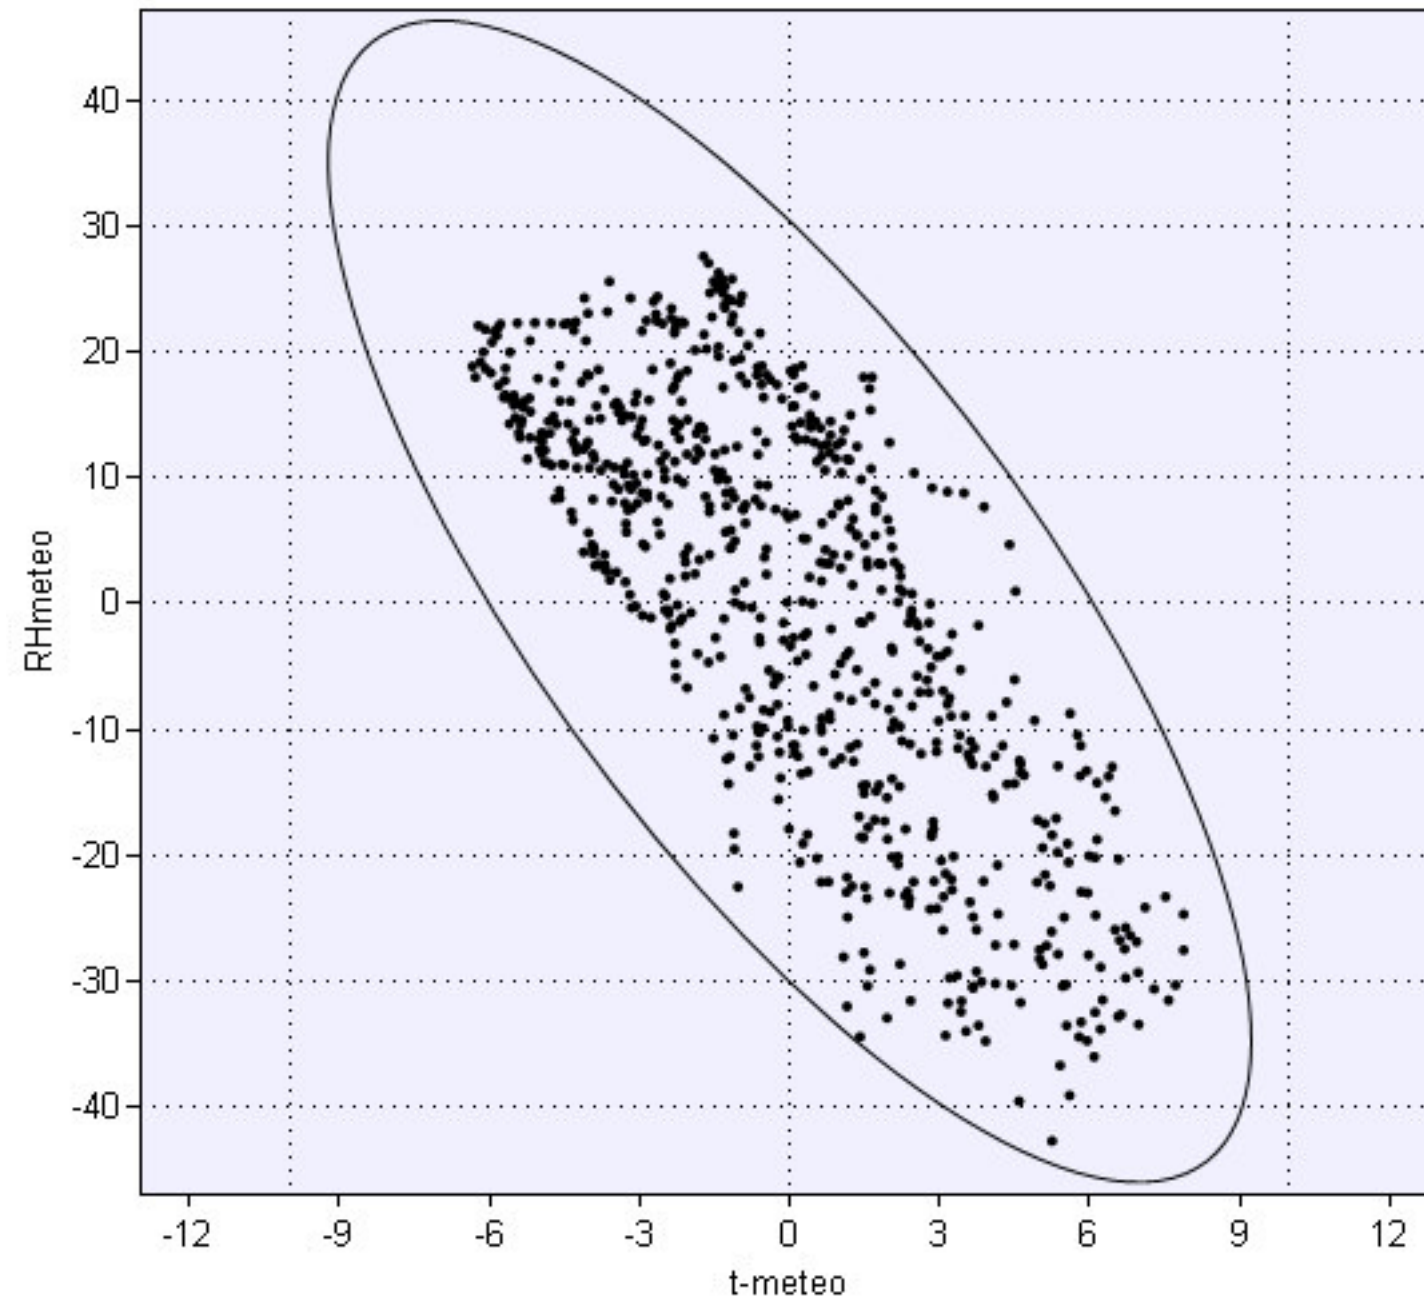

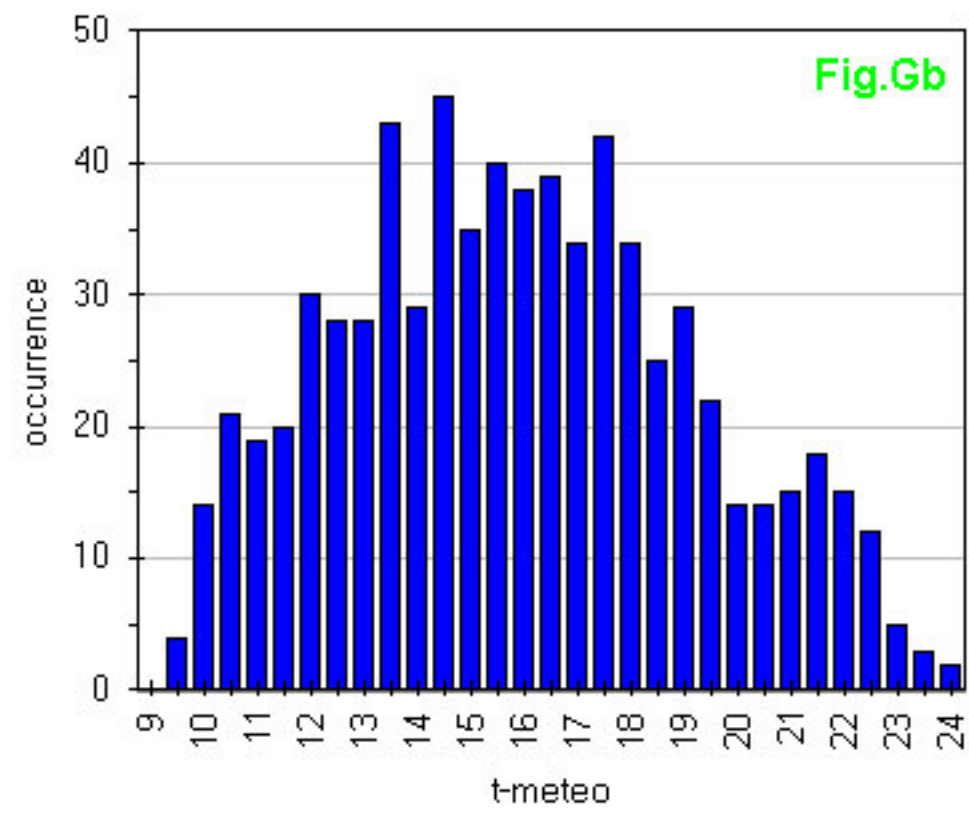



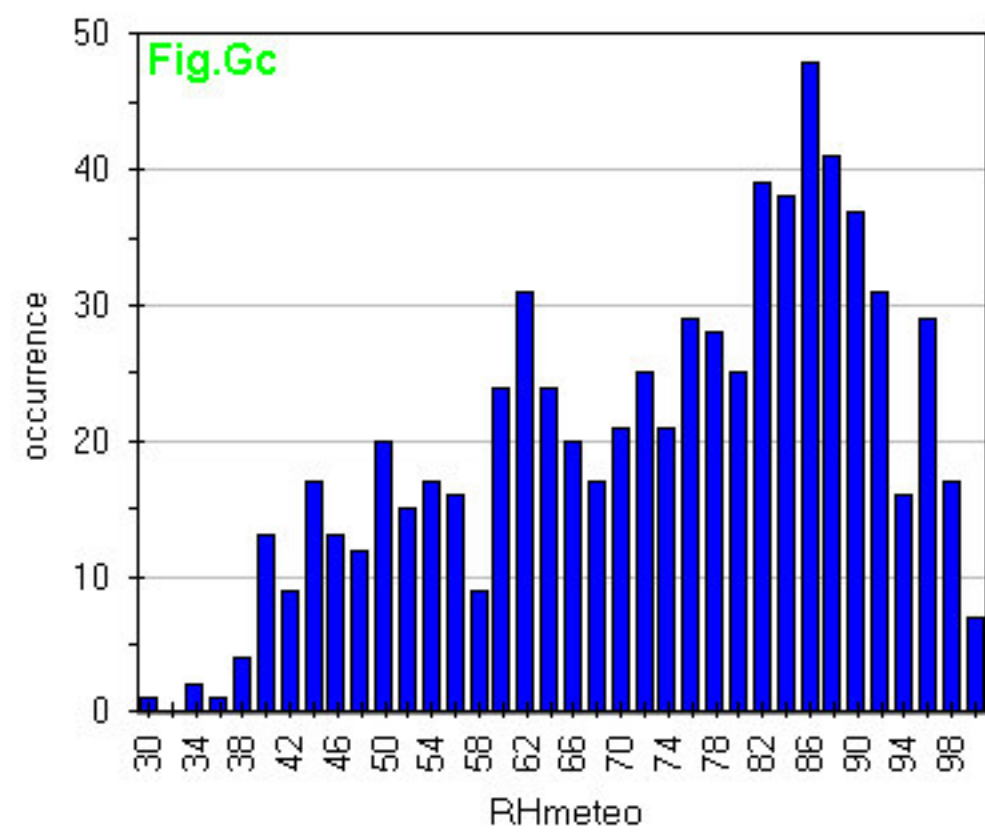

Fig.Ha

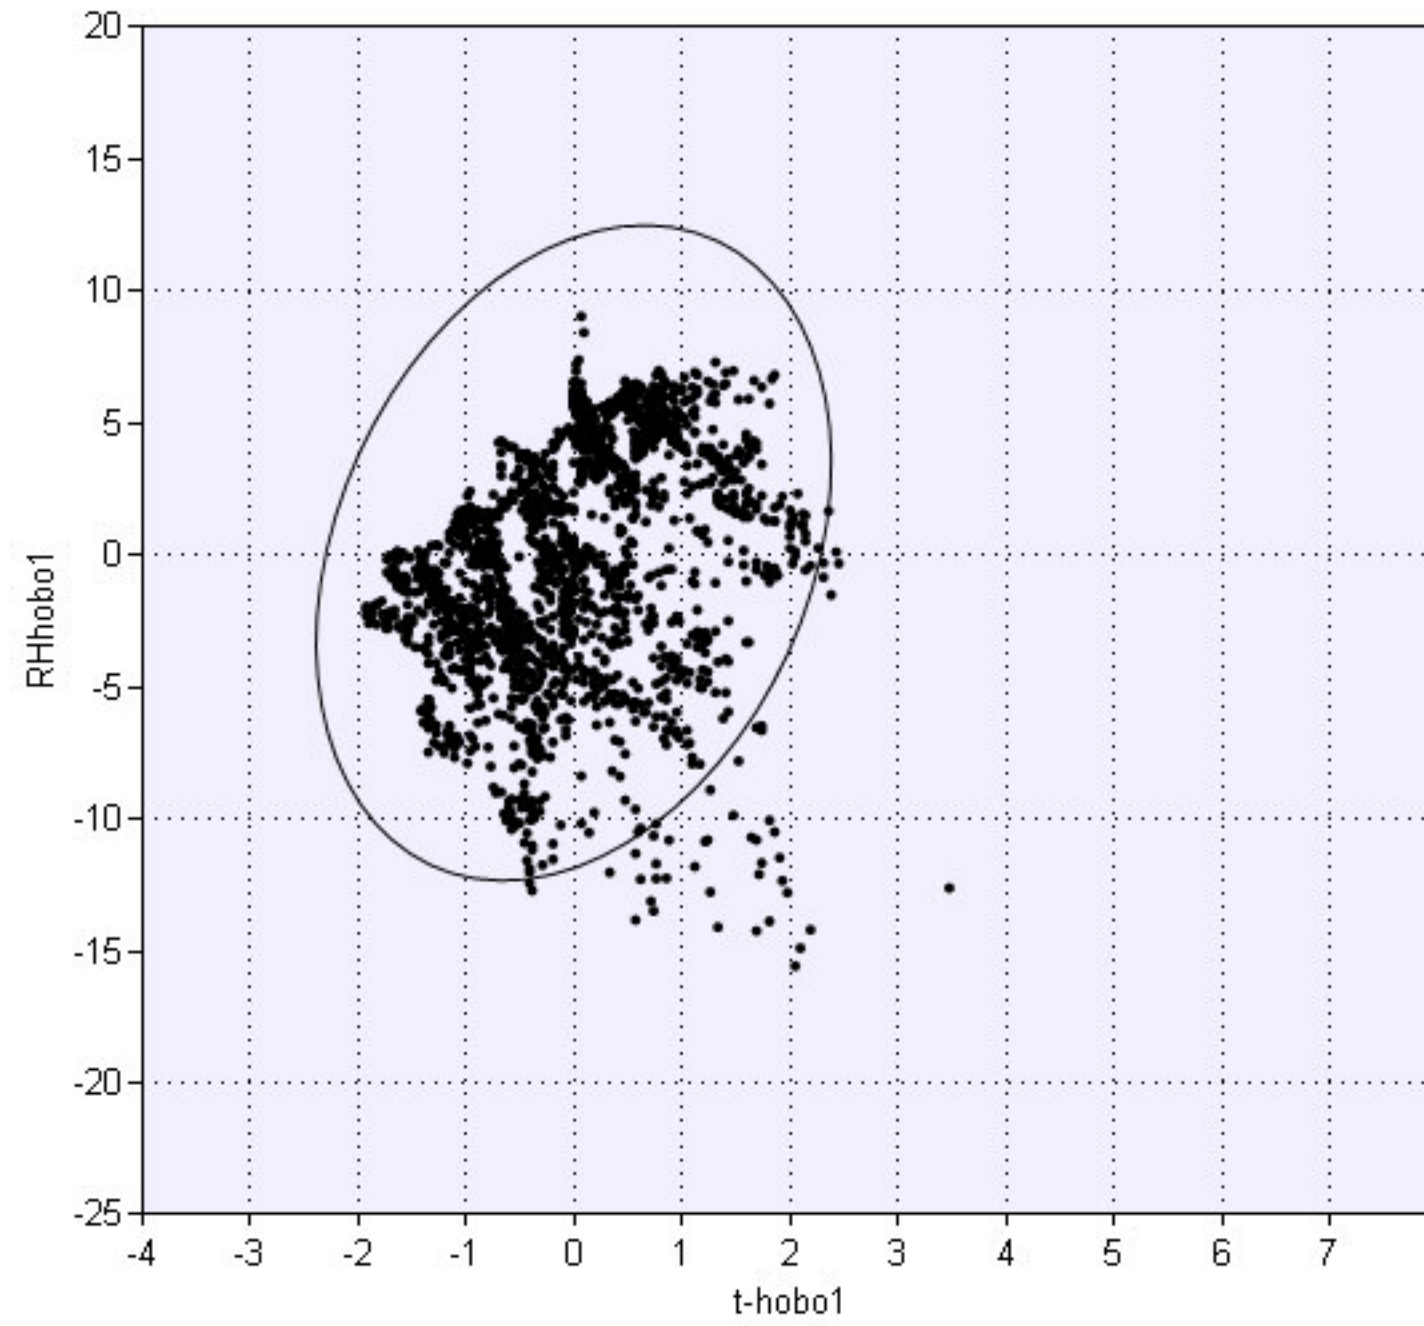

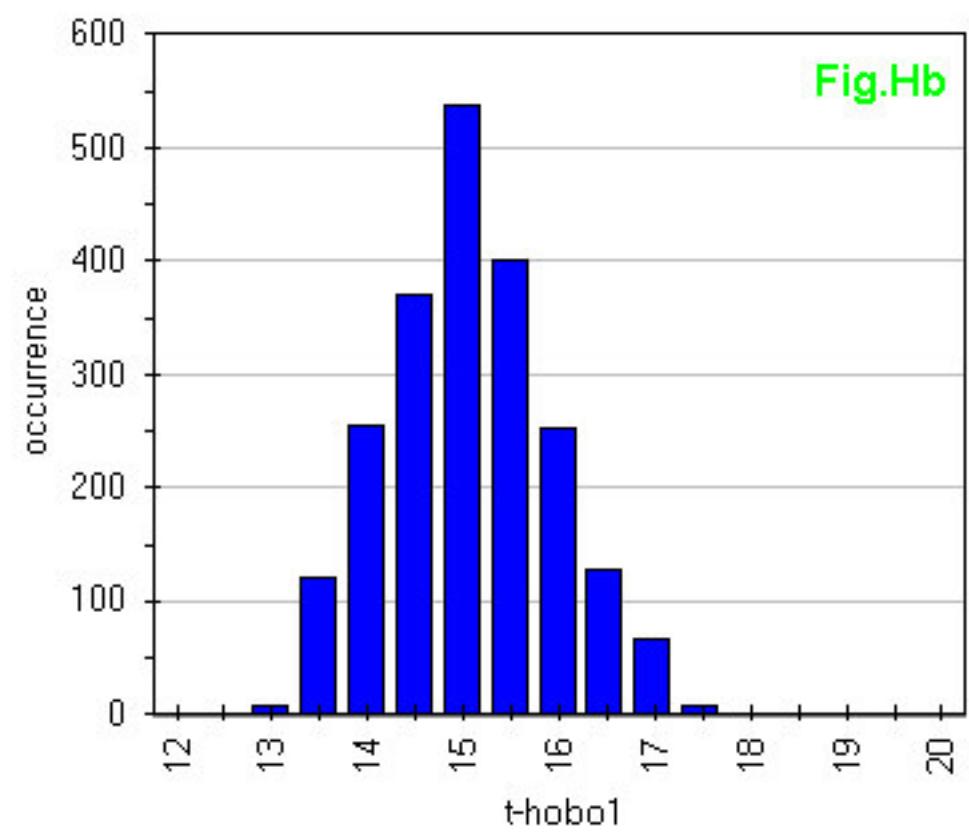

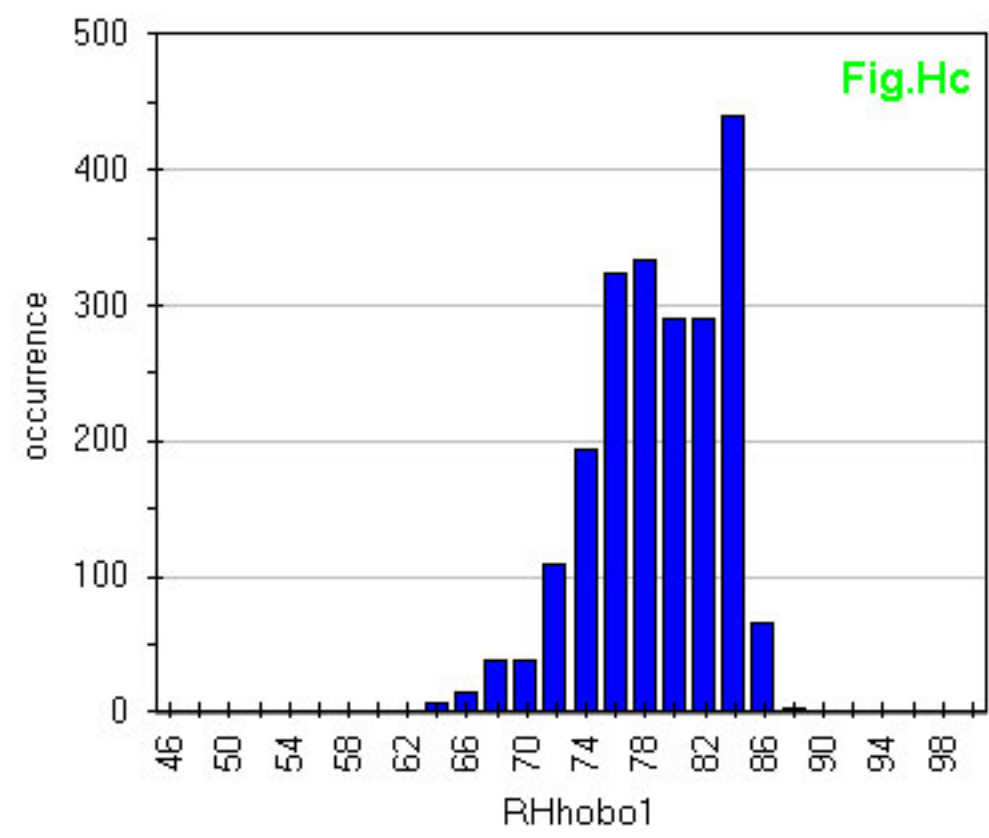

Fig.1a

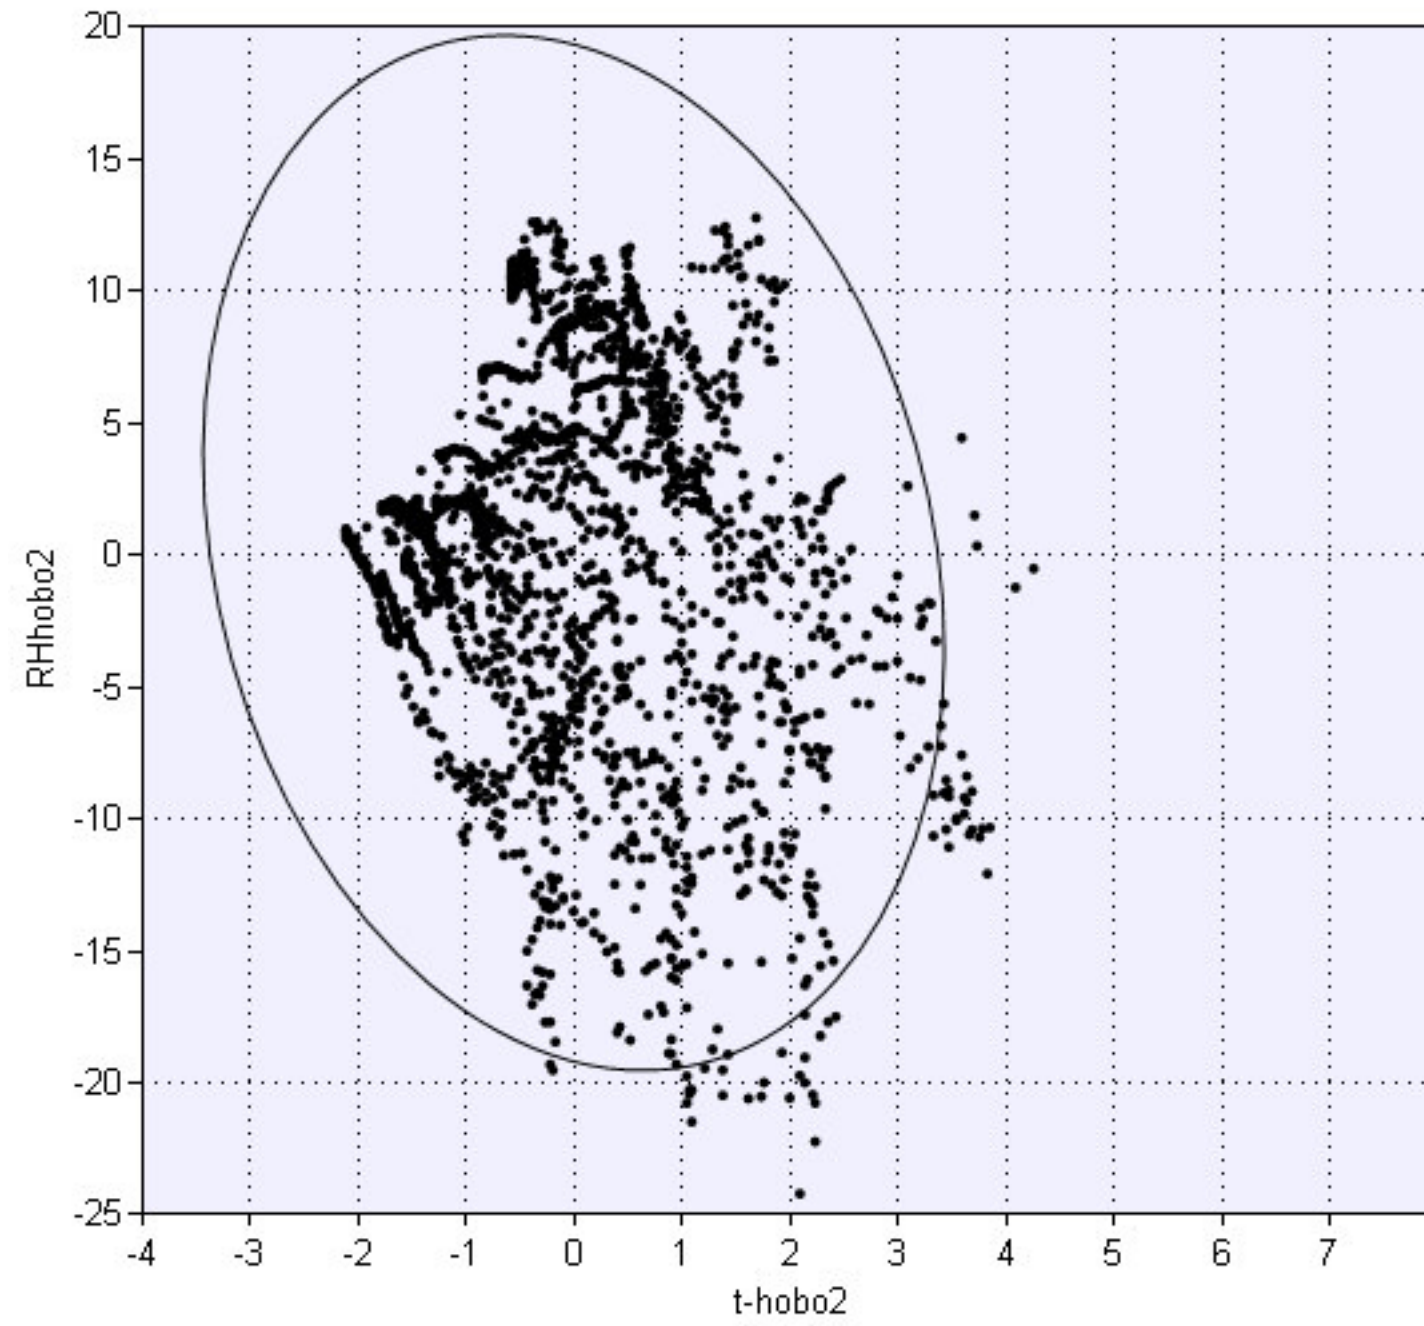

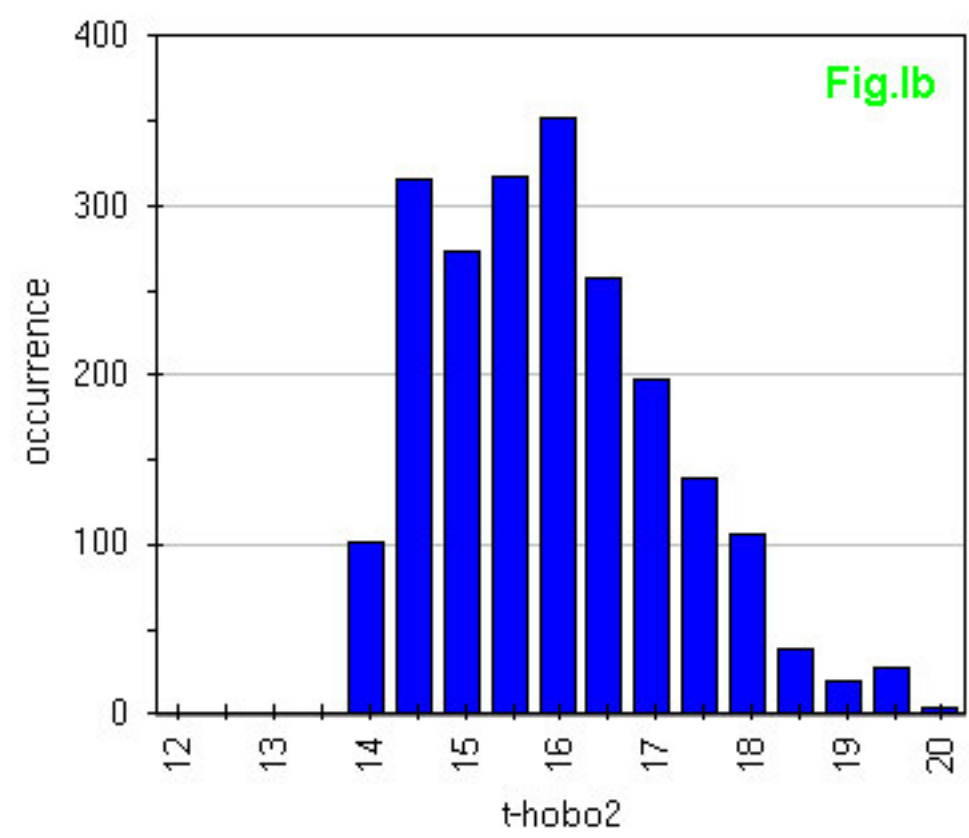

Fig.1b

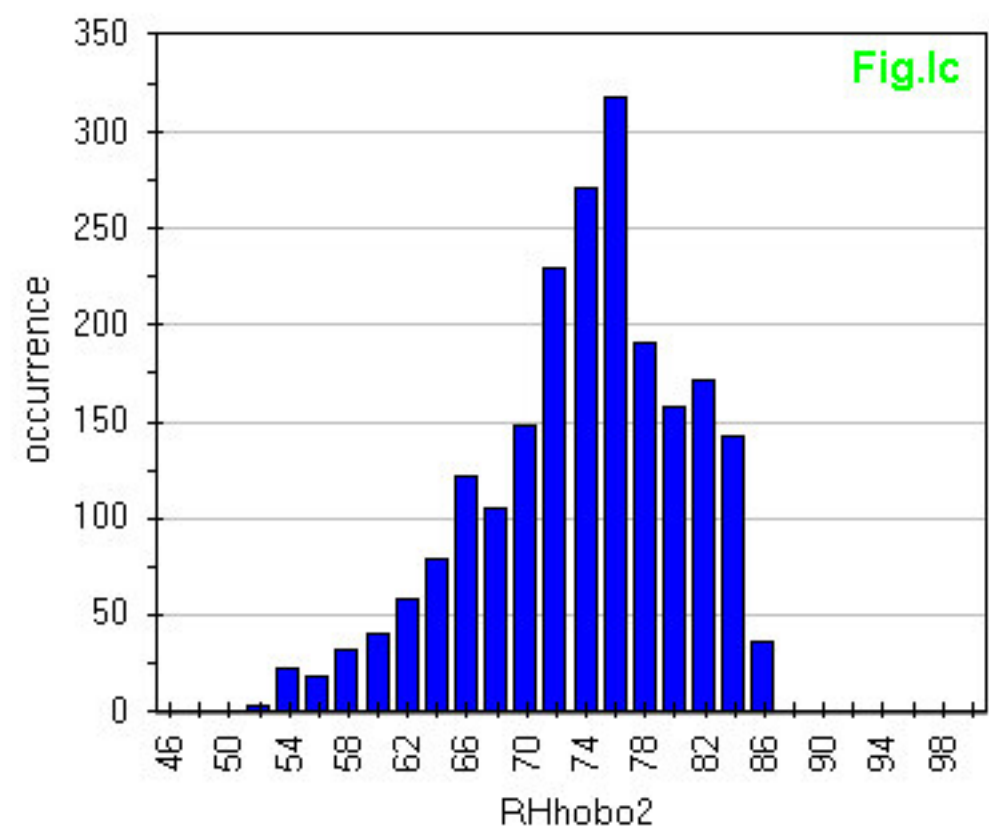

Fig.Ja

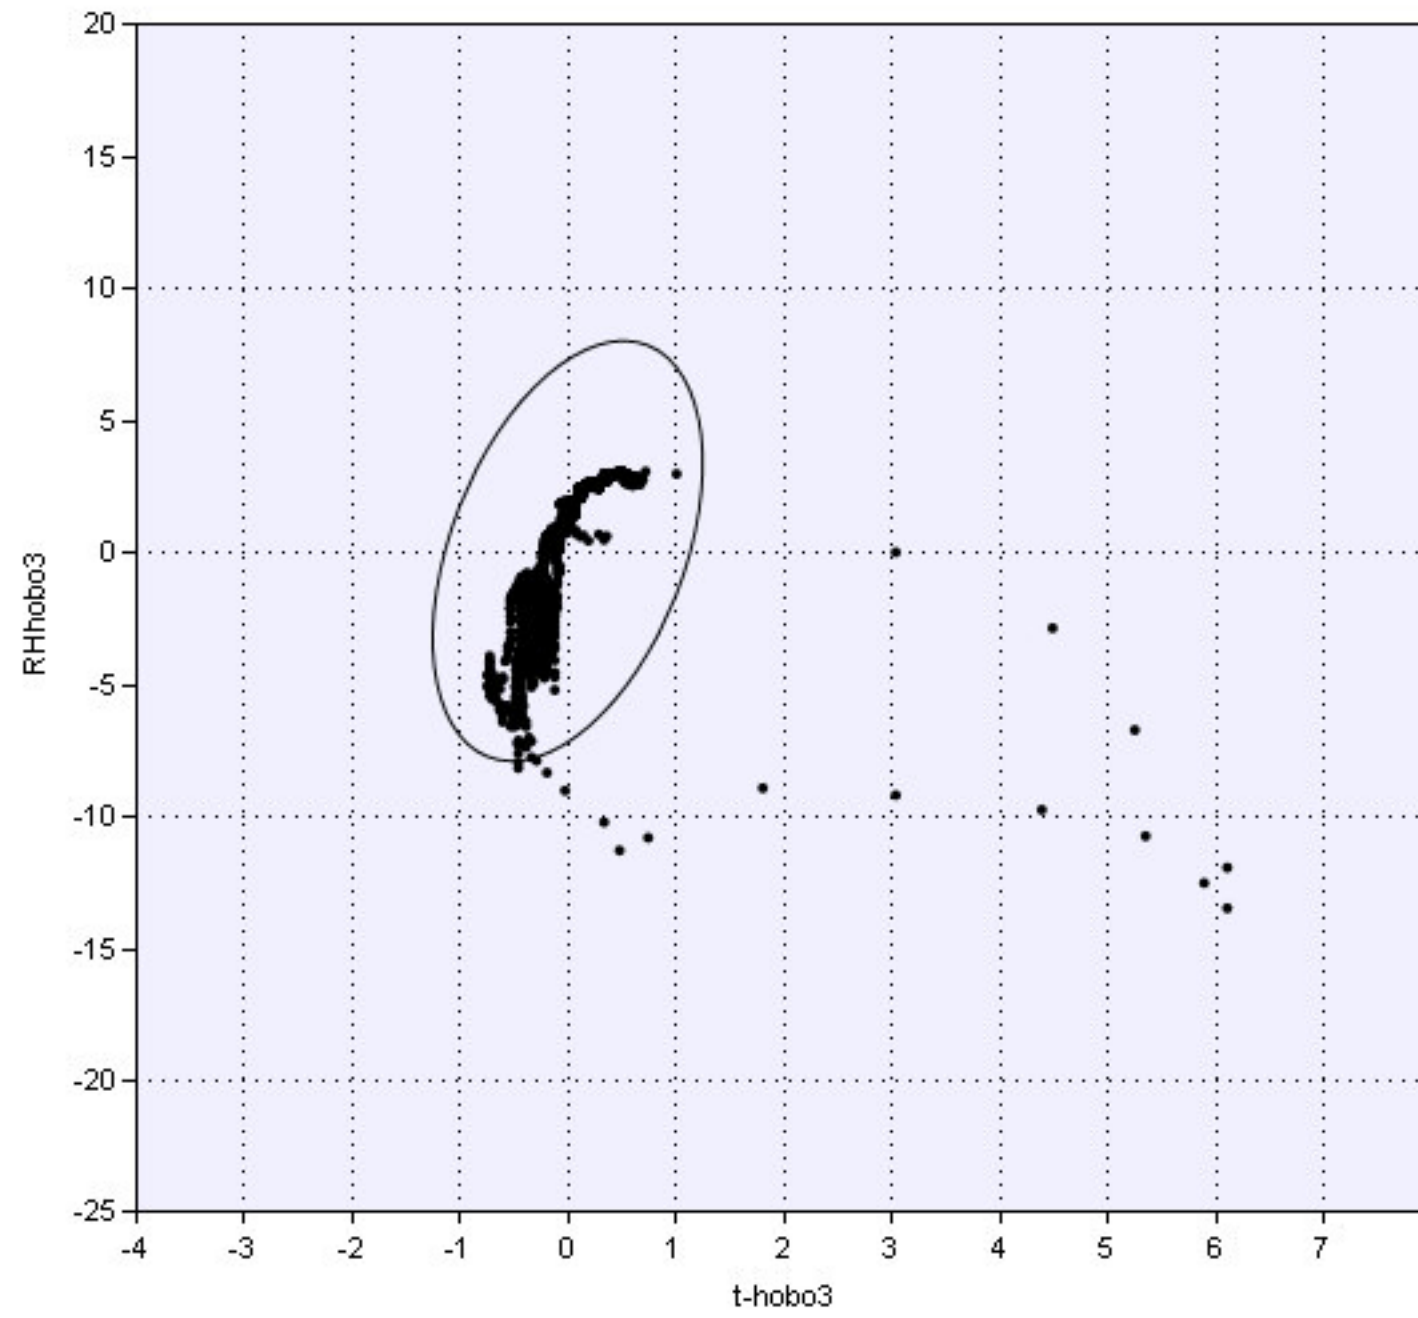



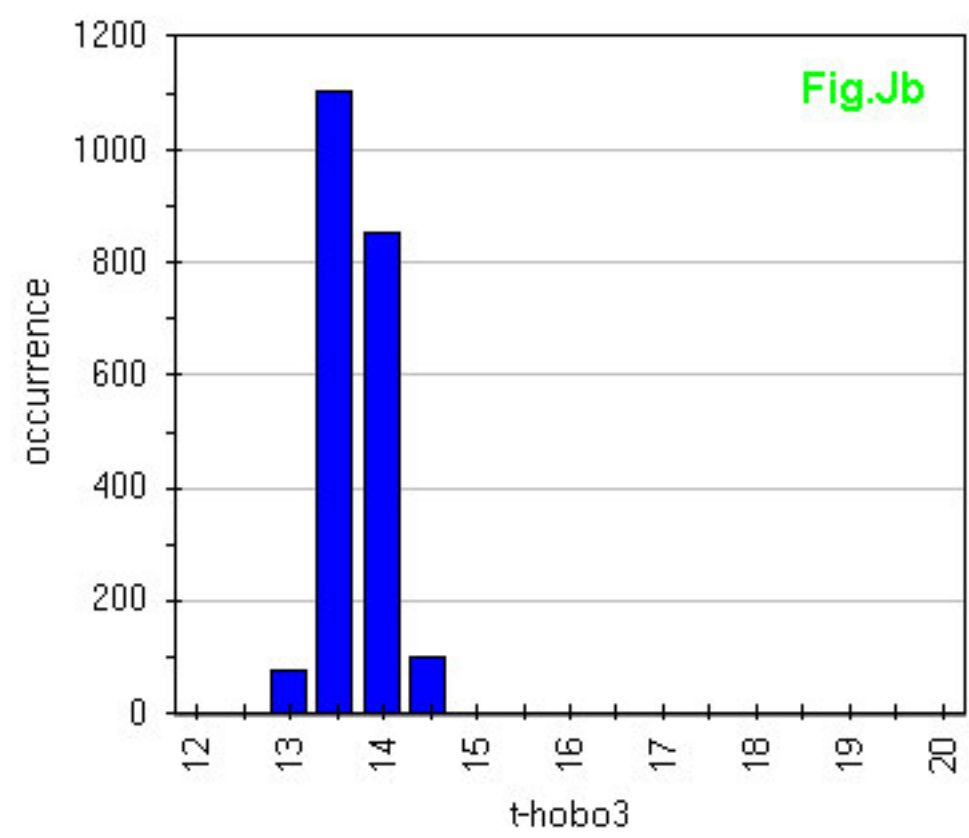

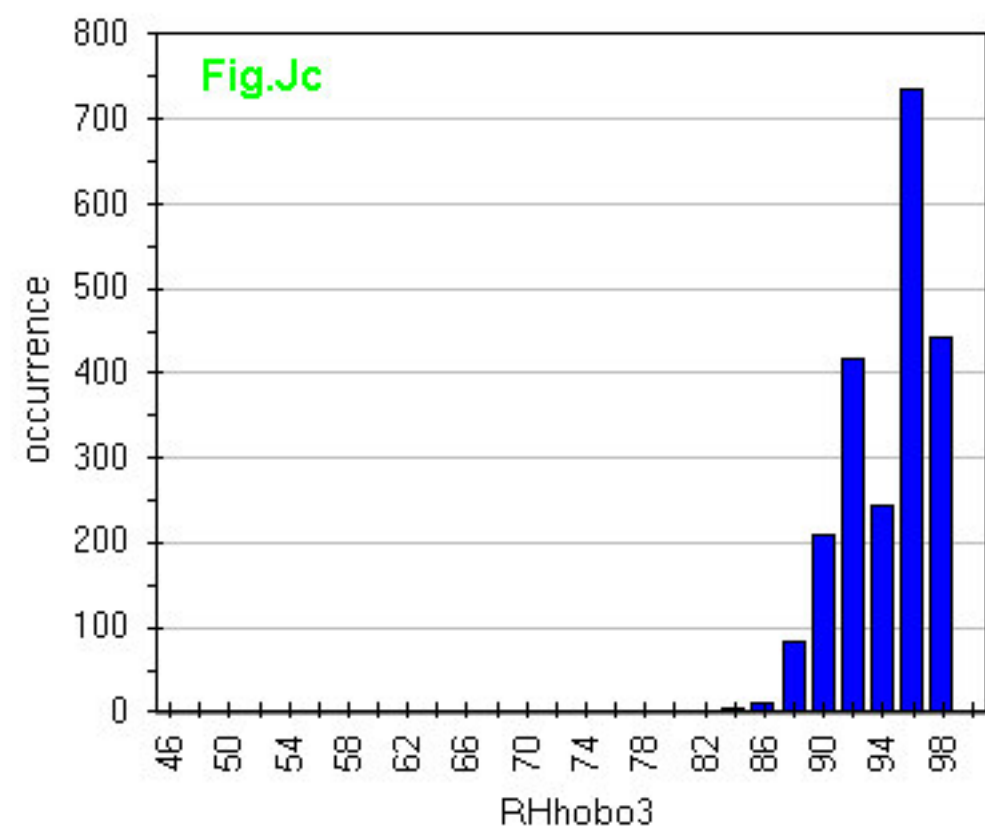

Fig.Ka

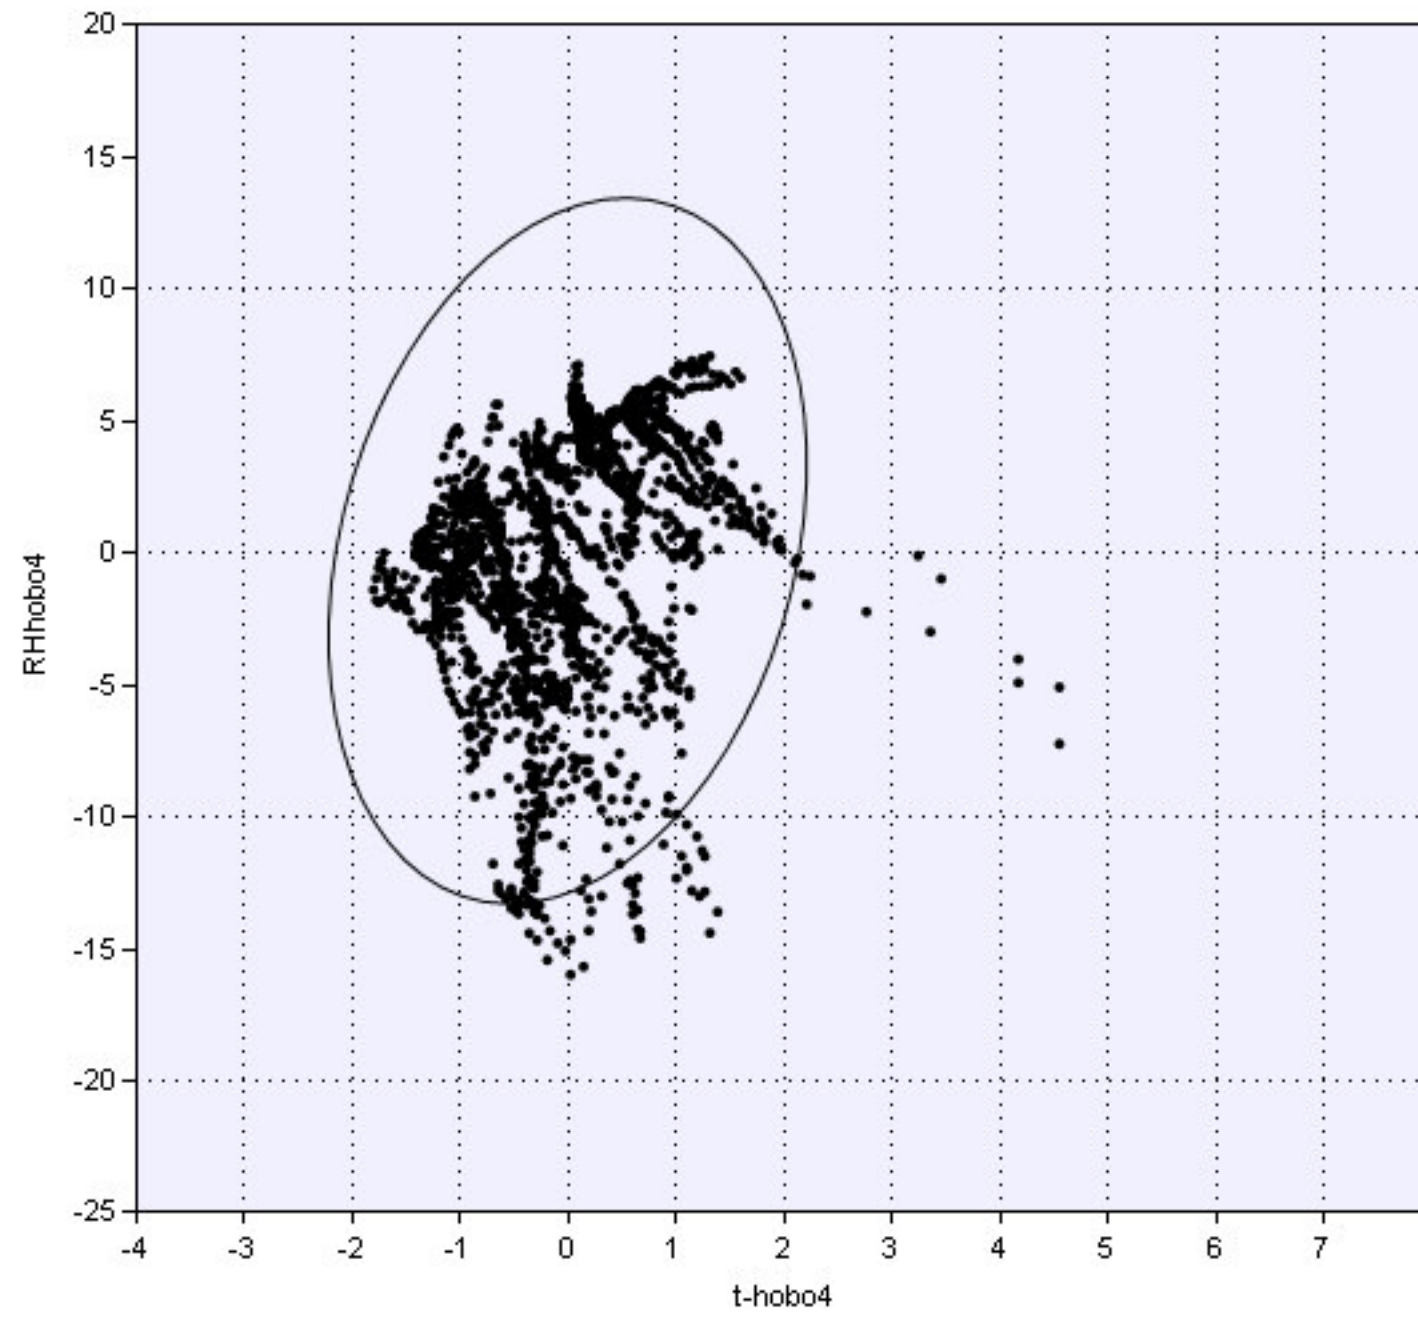

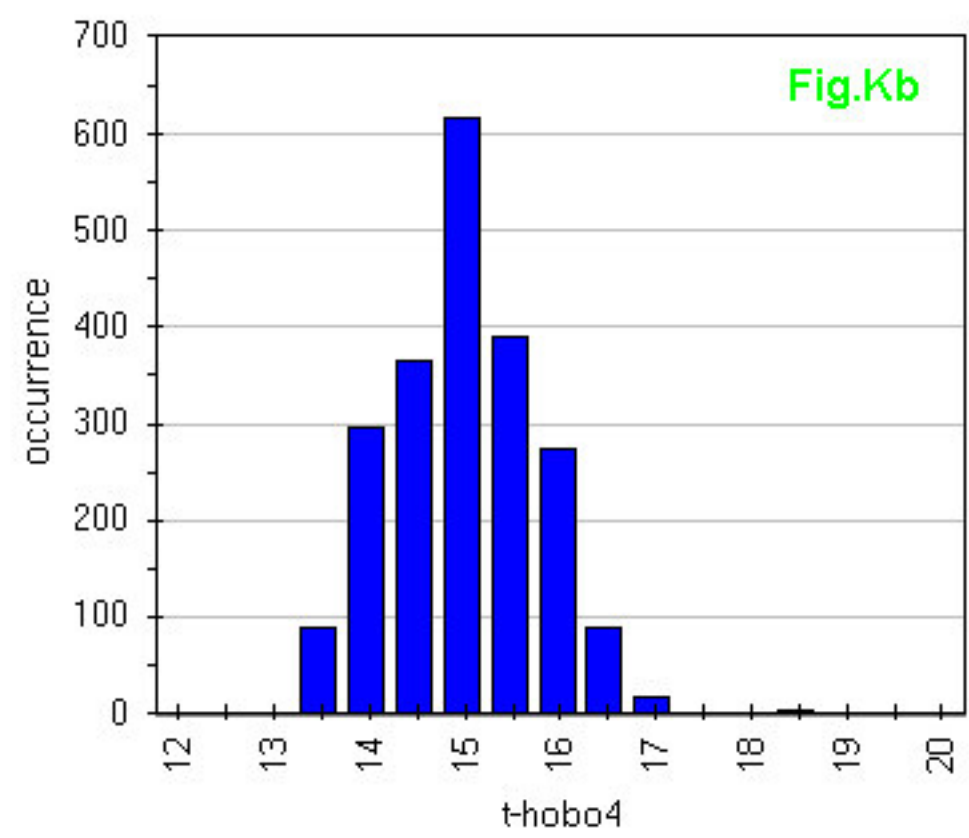

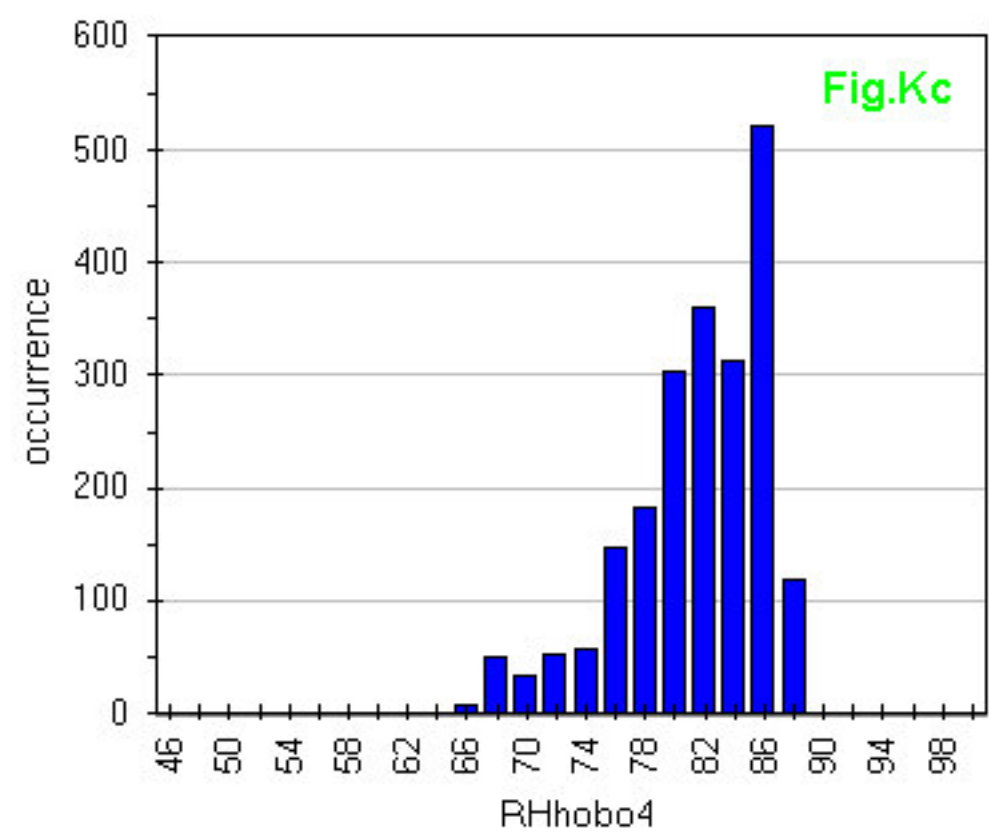

Fig.La

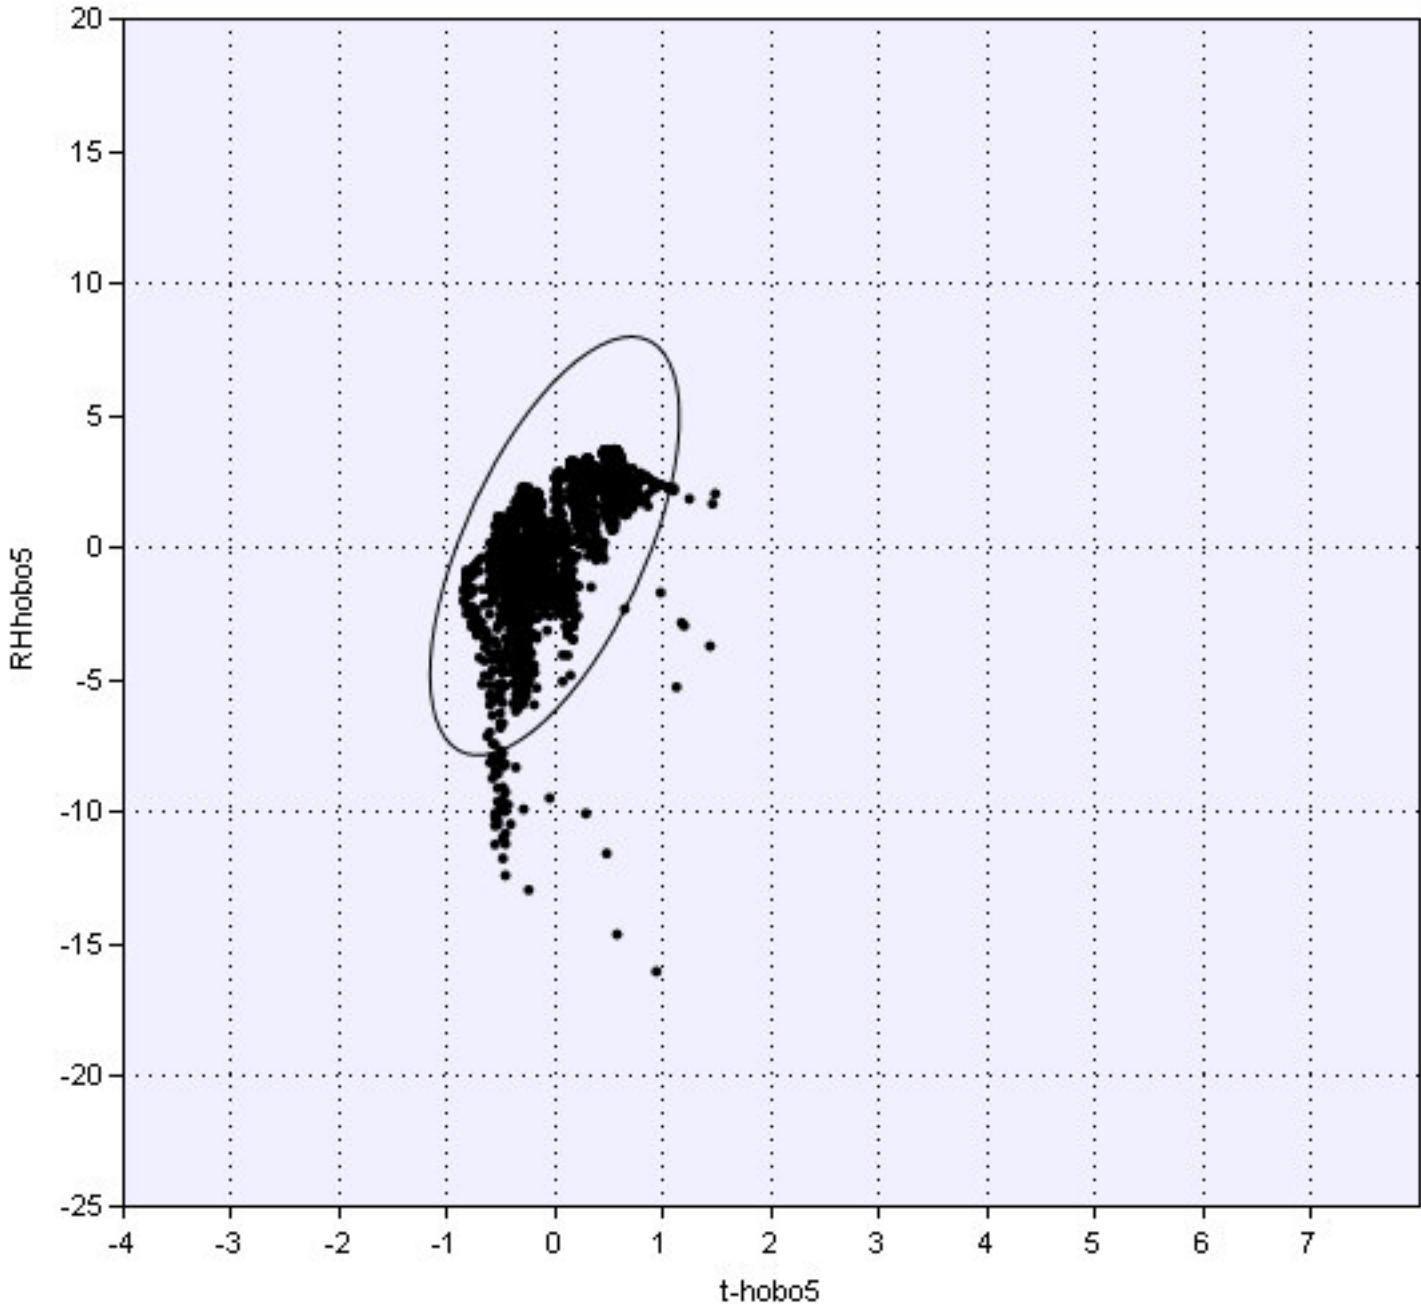

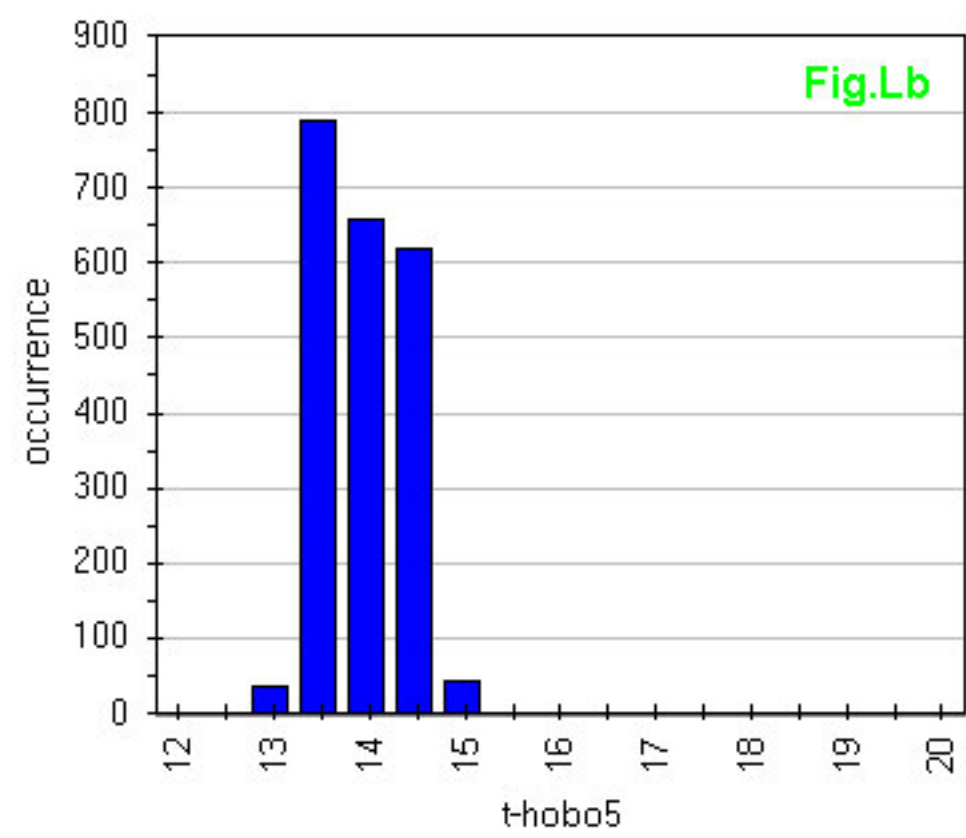

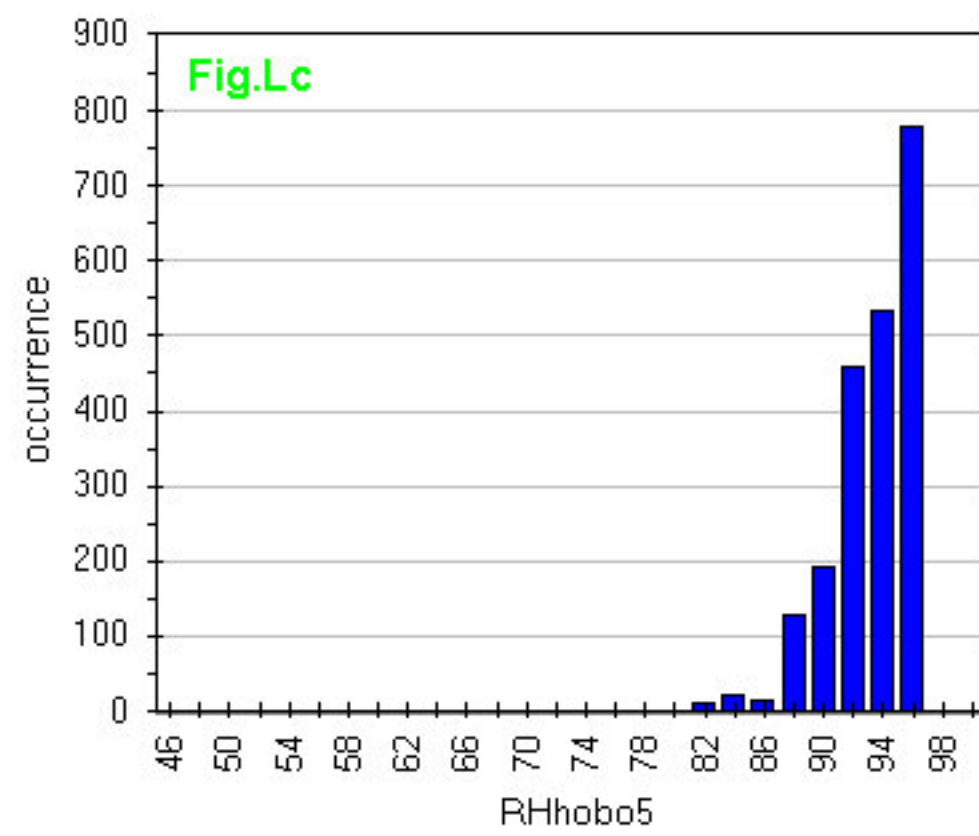



Fig.Ma

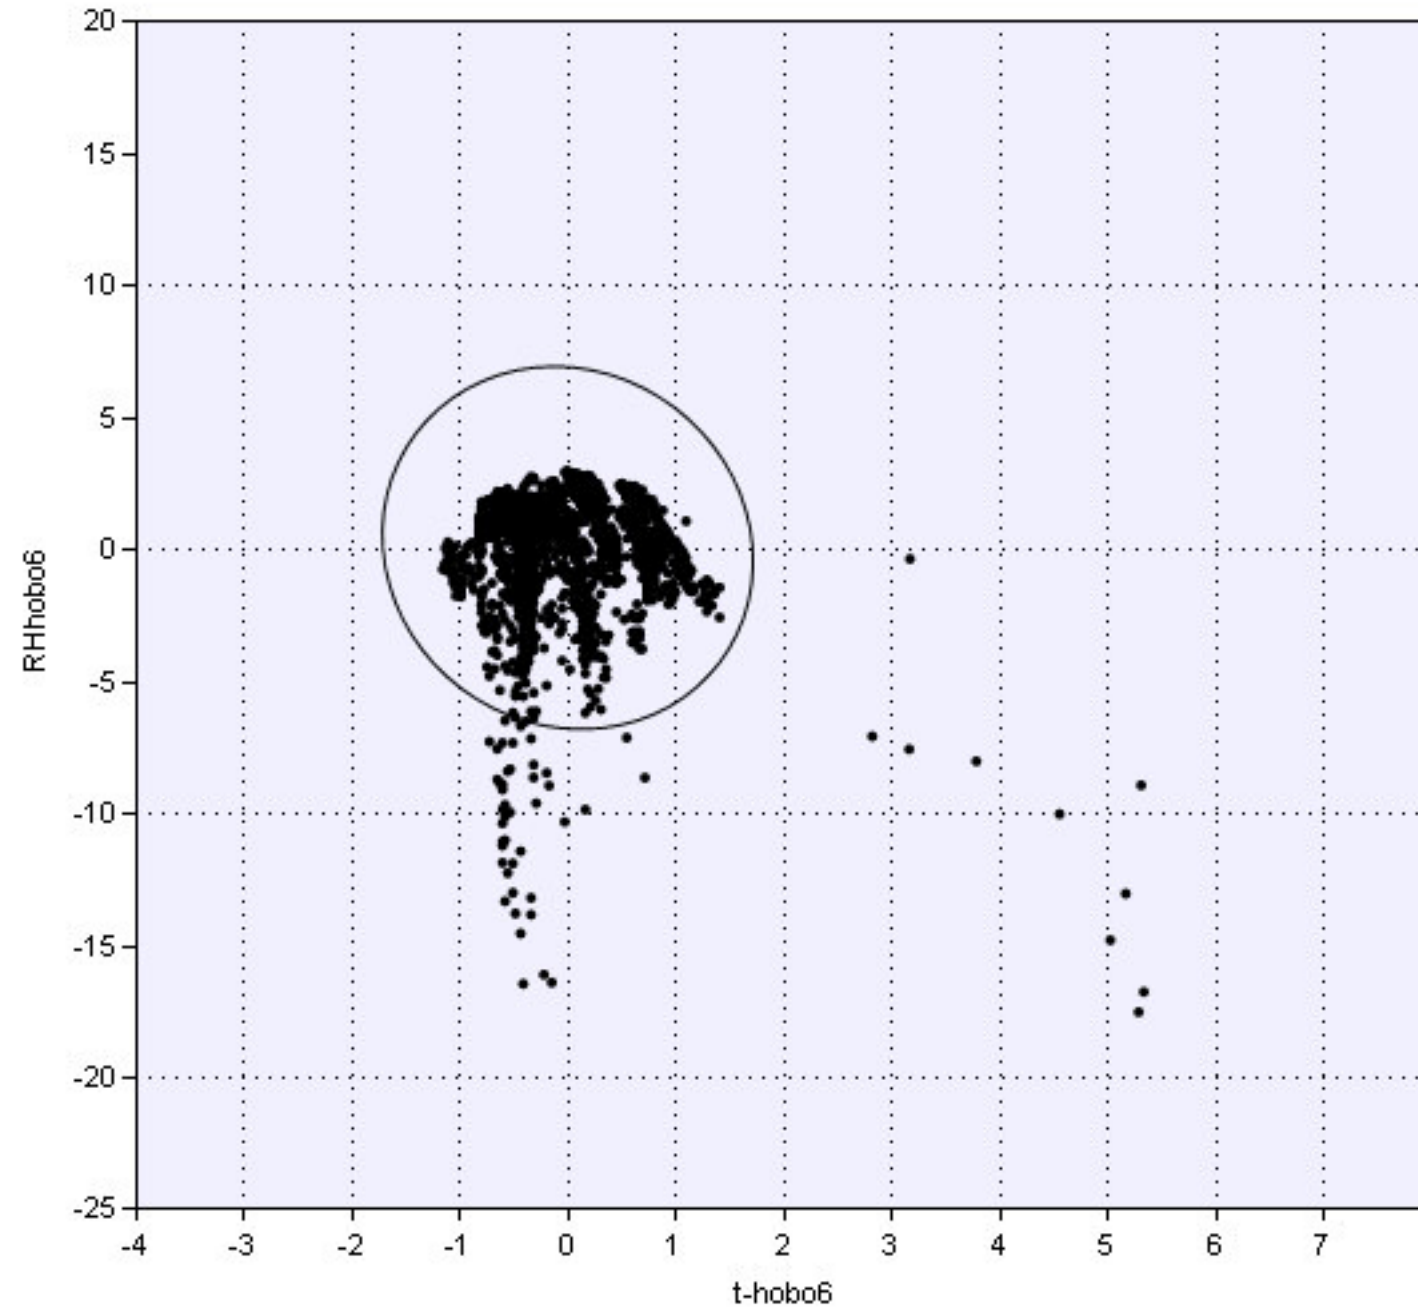

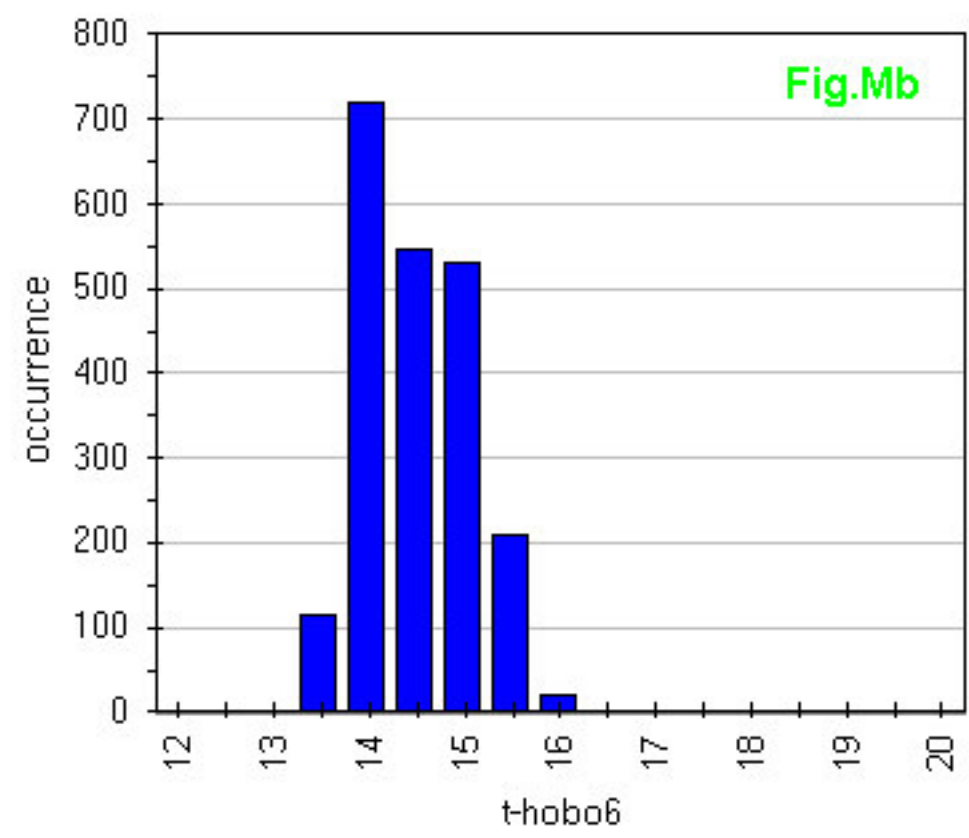

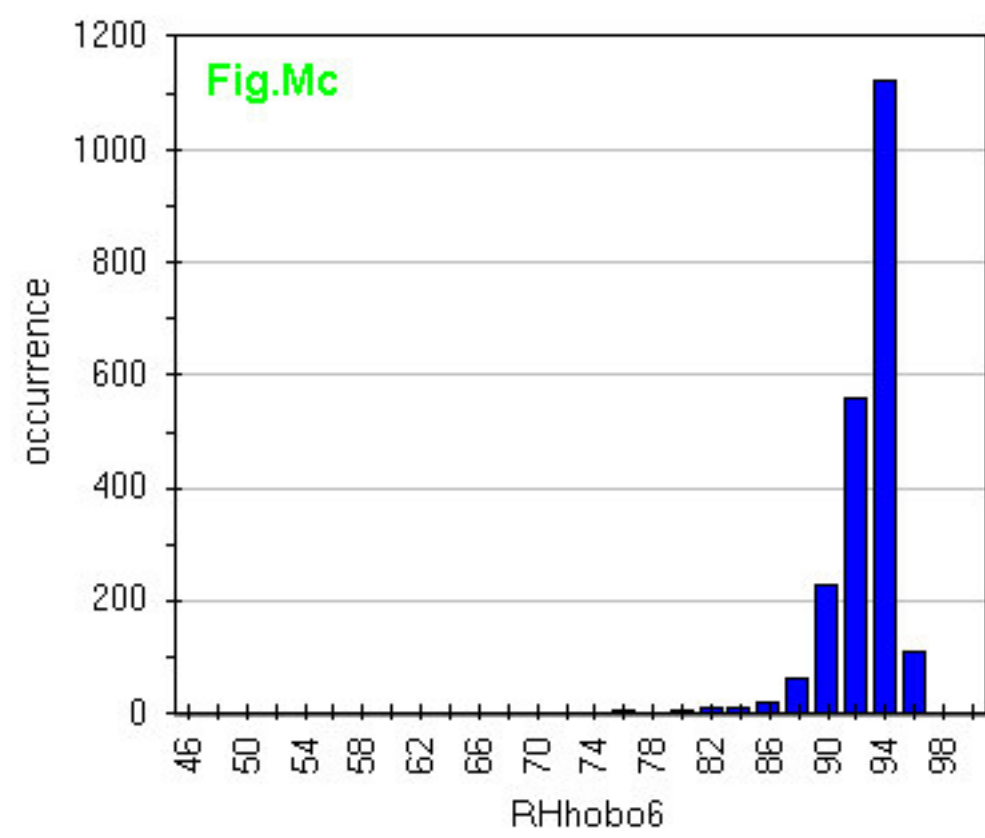

Fig.Na

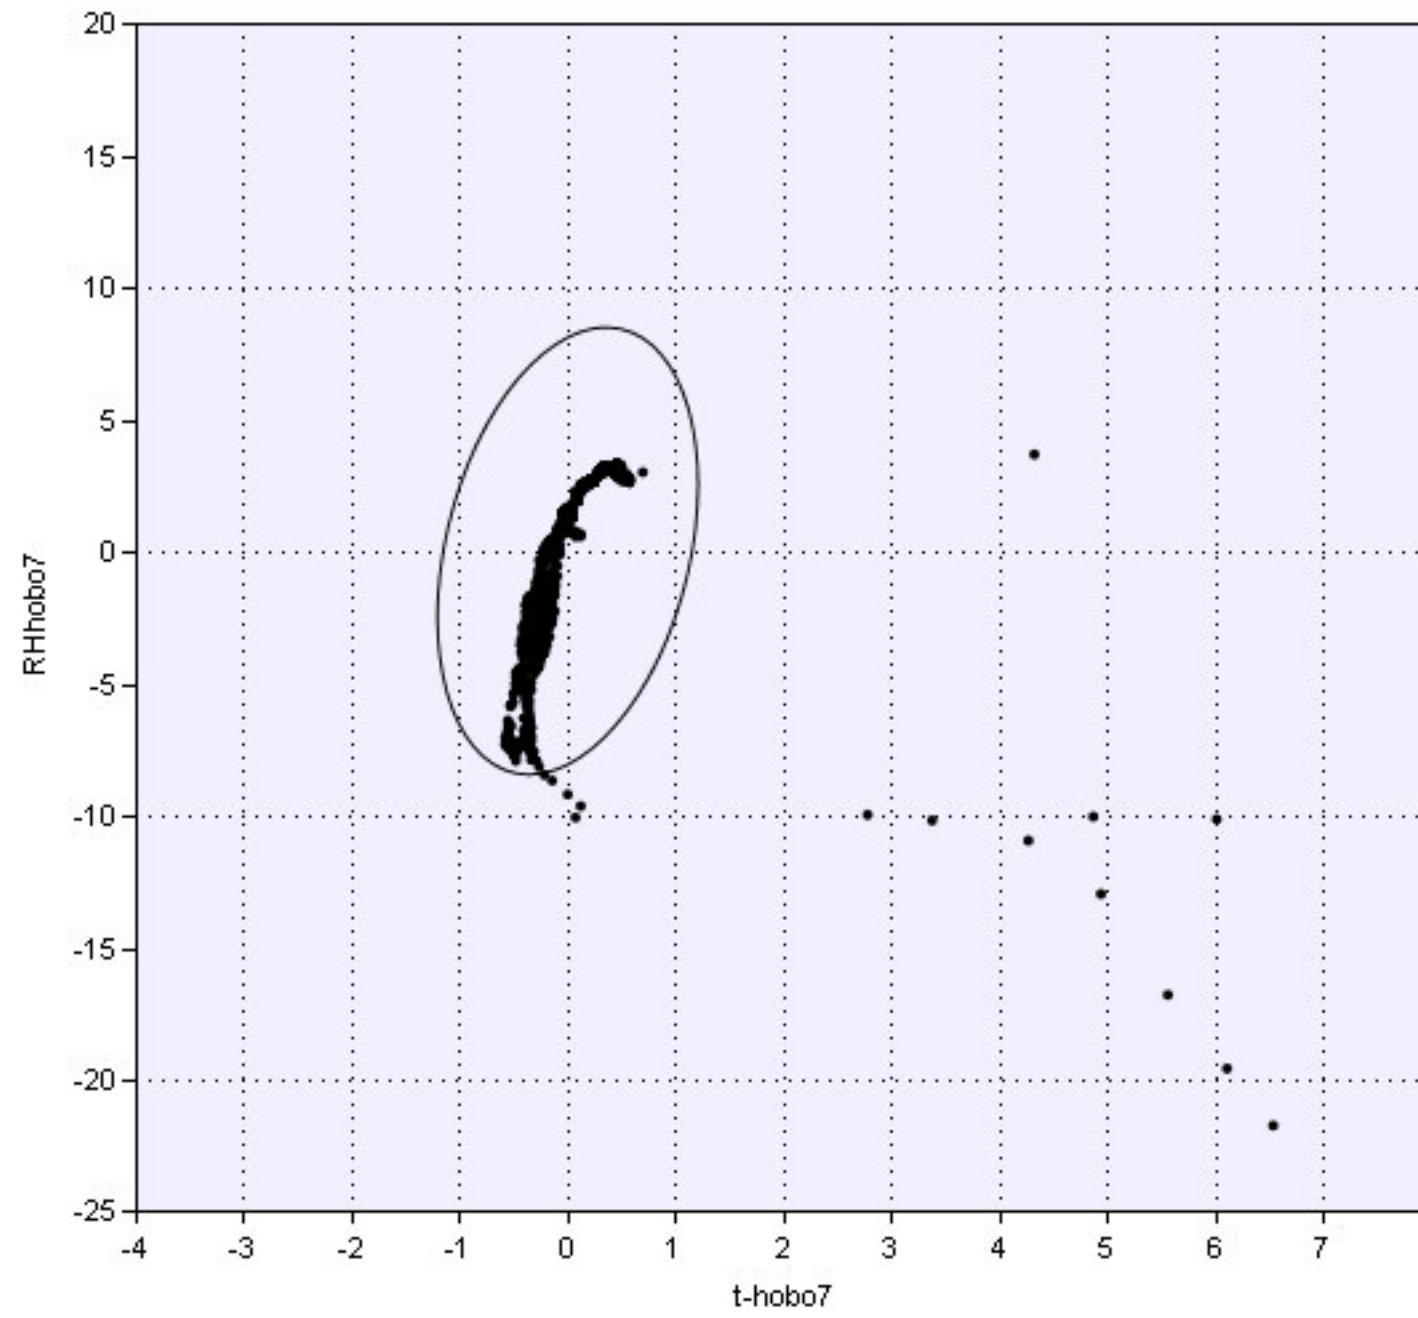

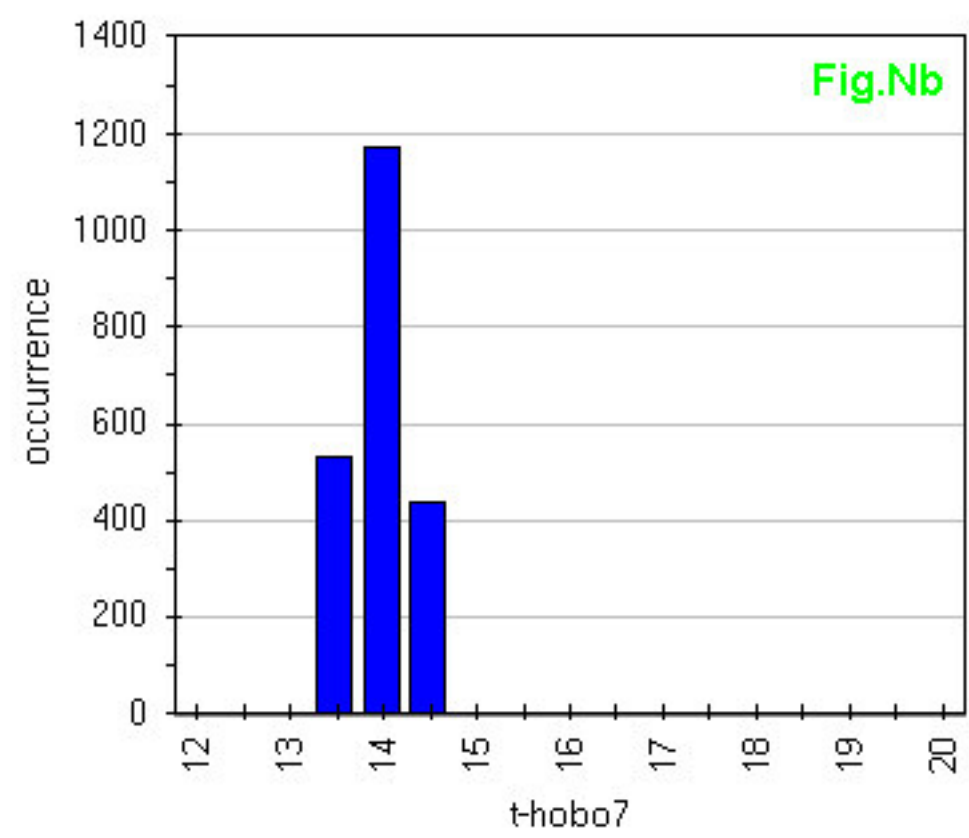

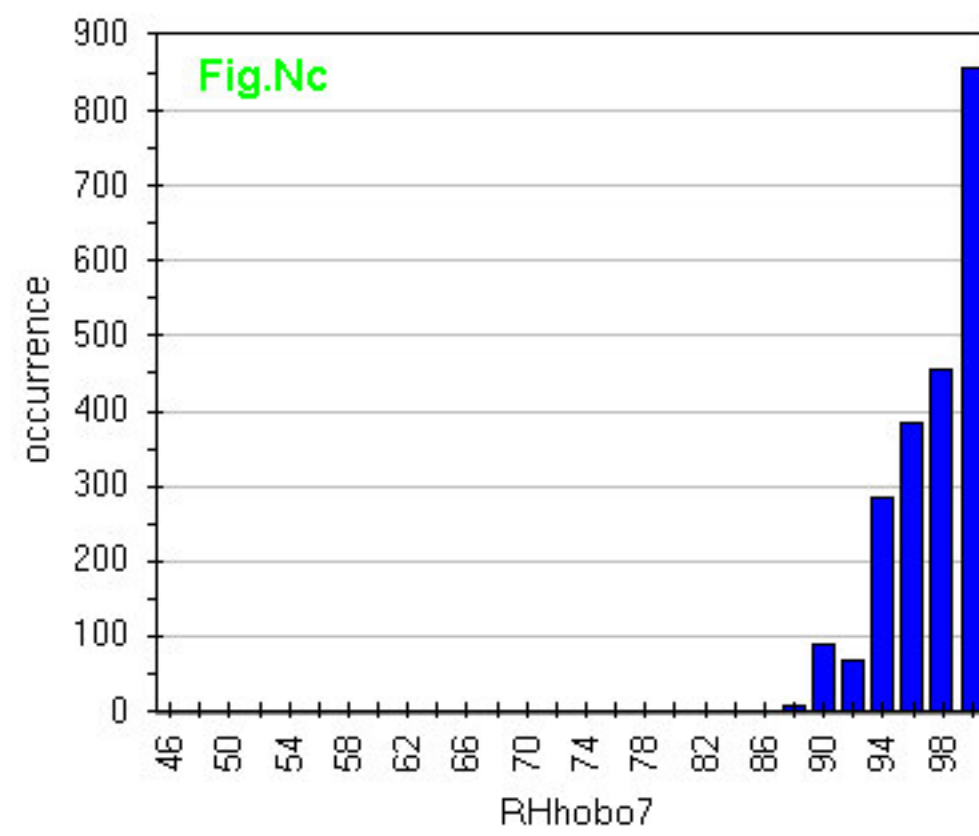

Fig.0a

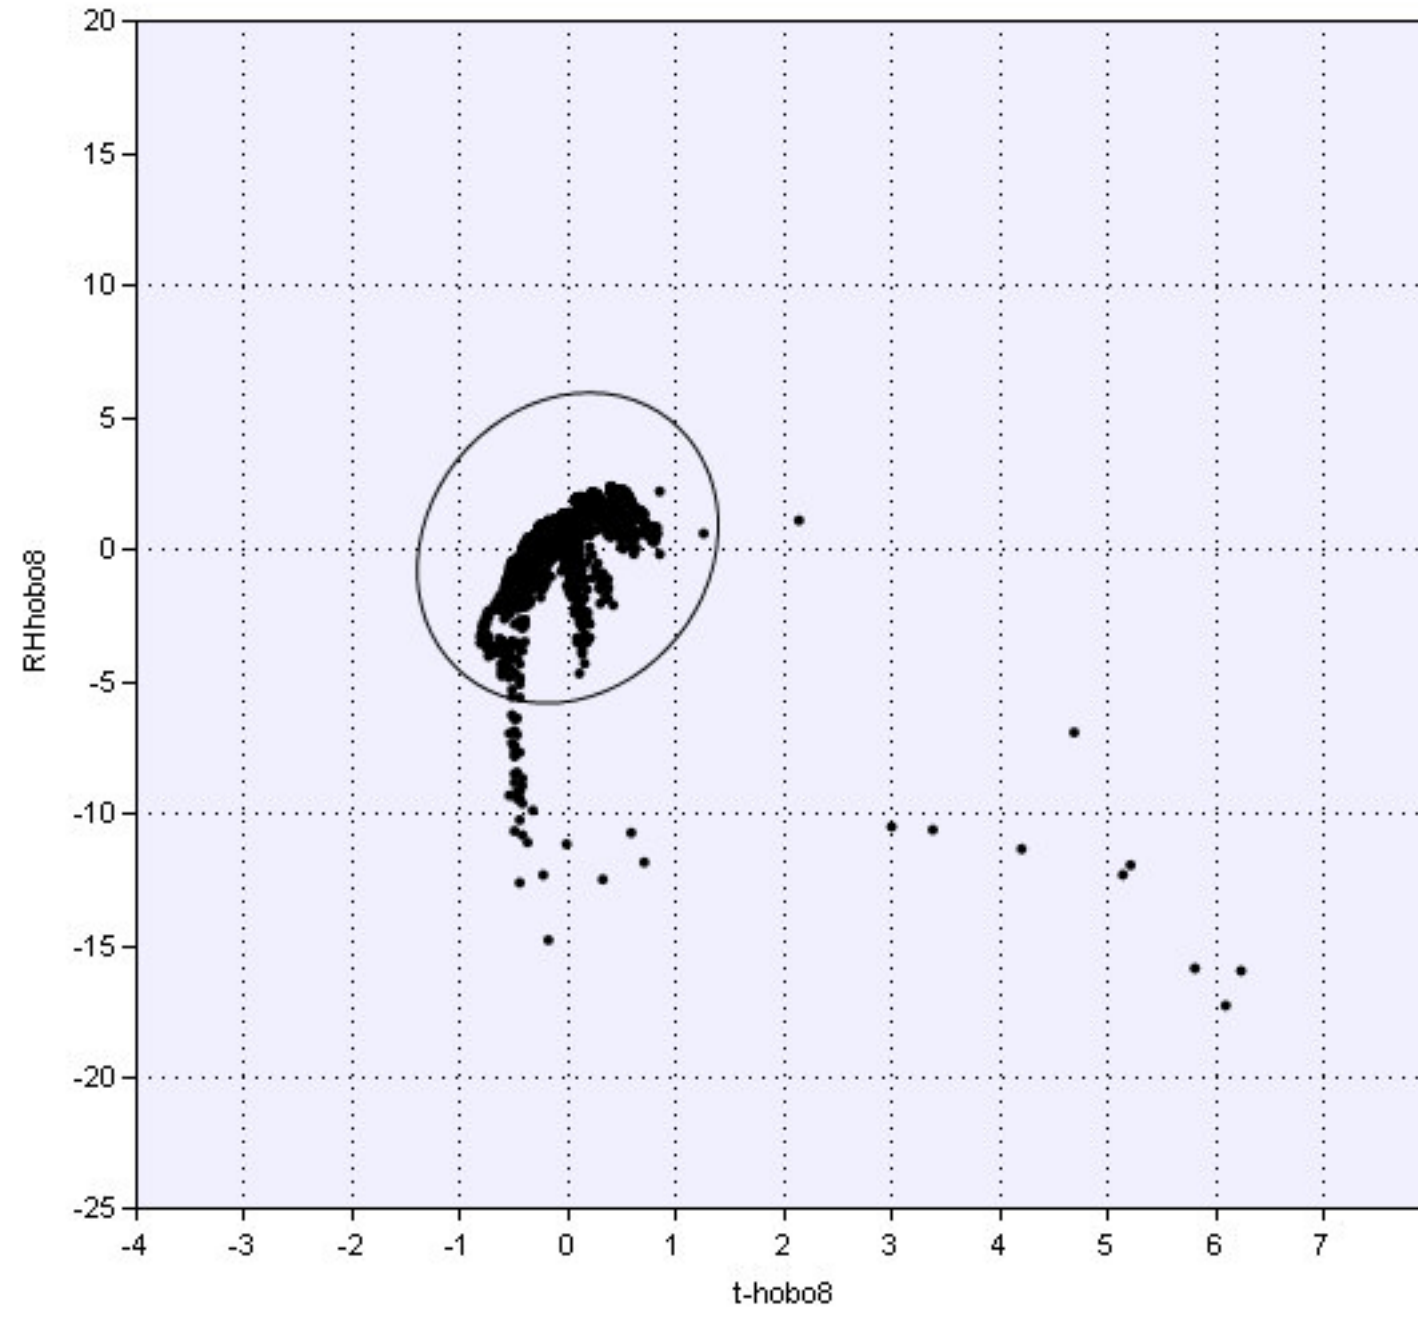

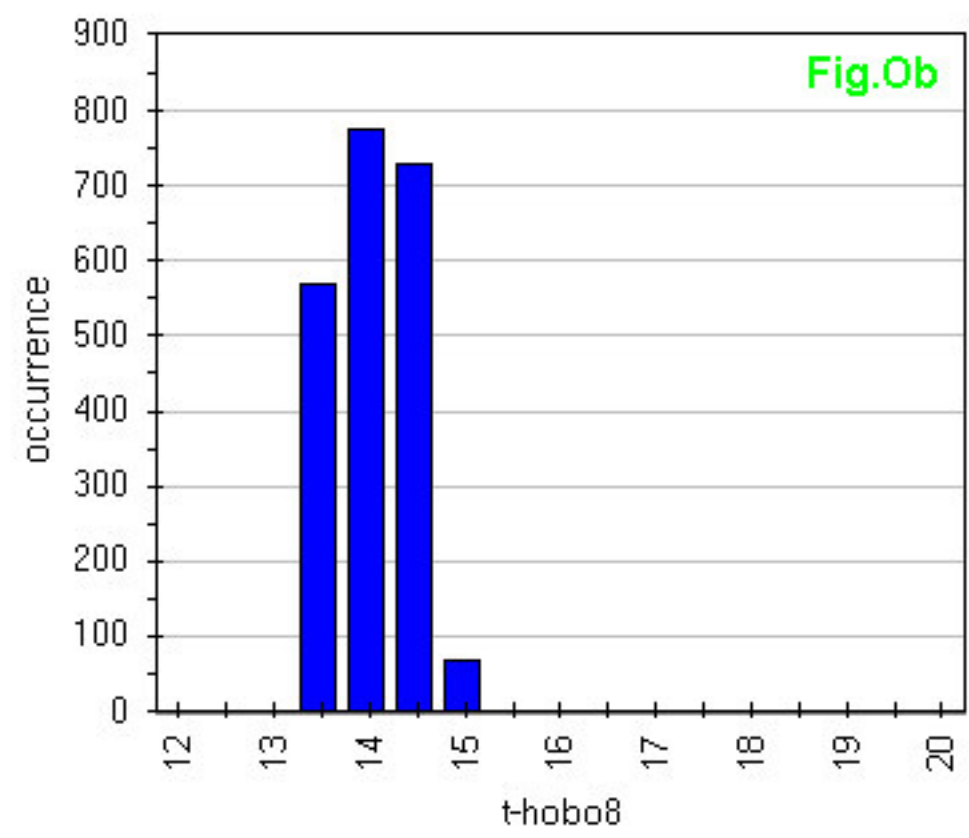



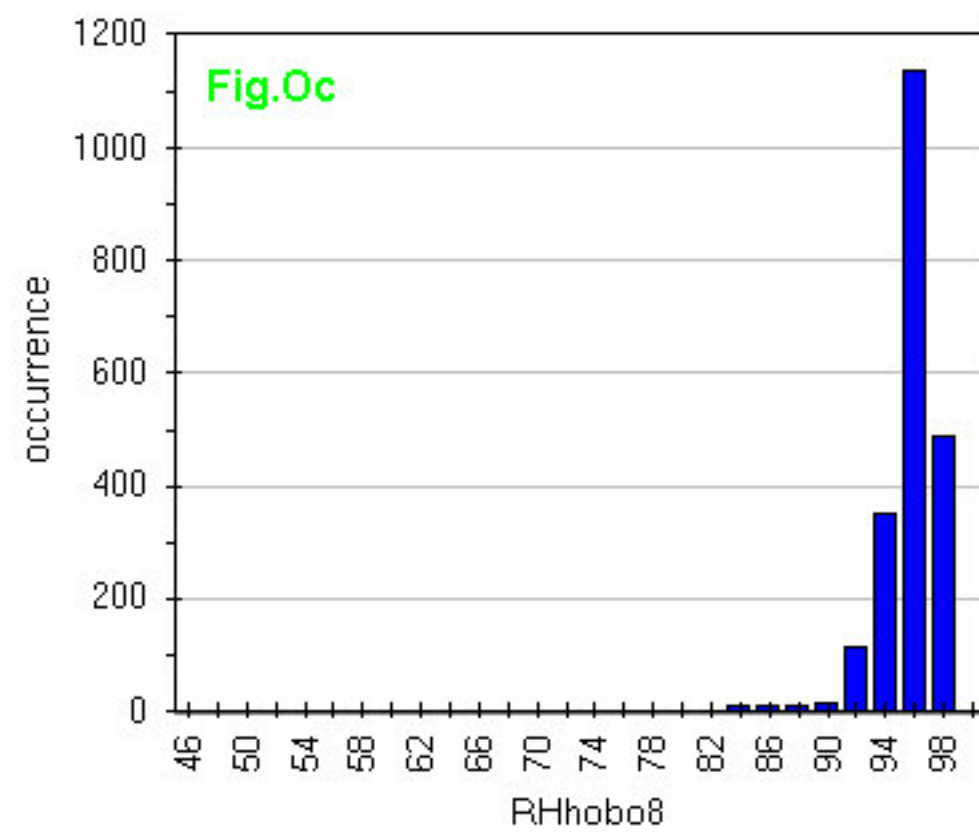

Fig.Pa

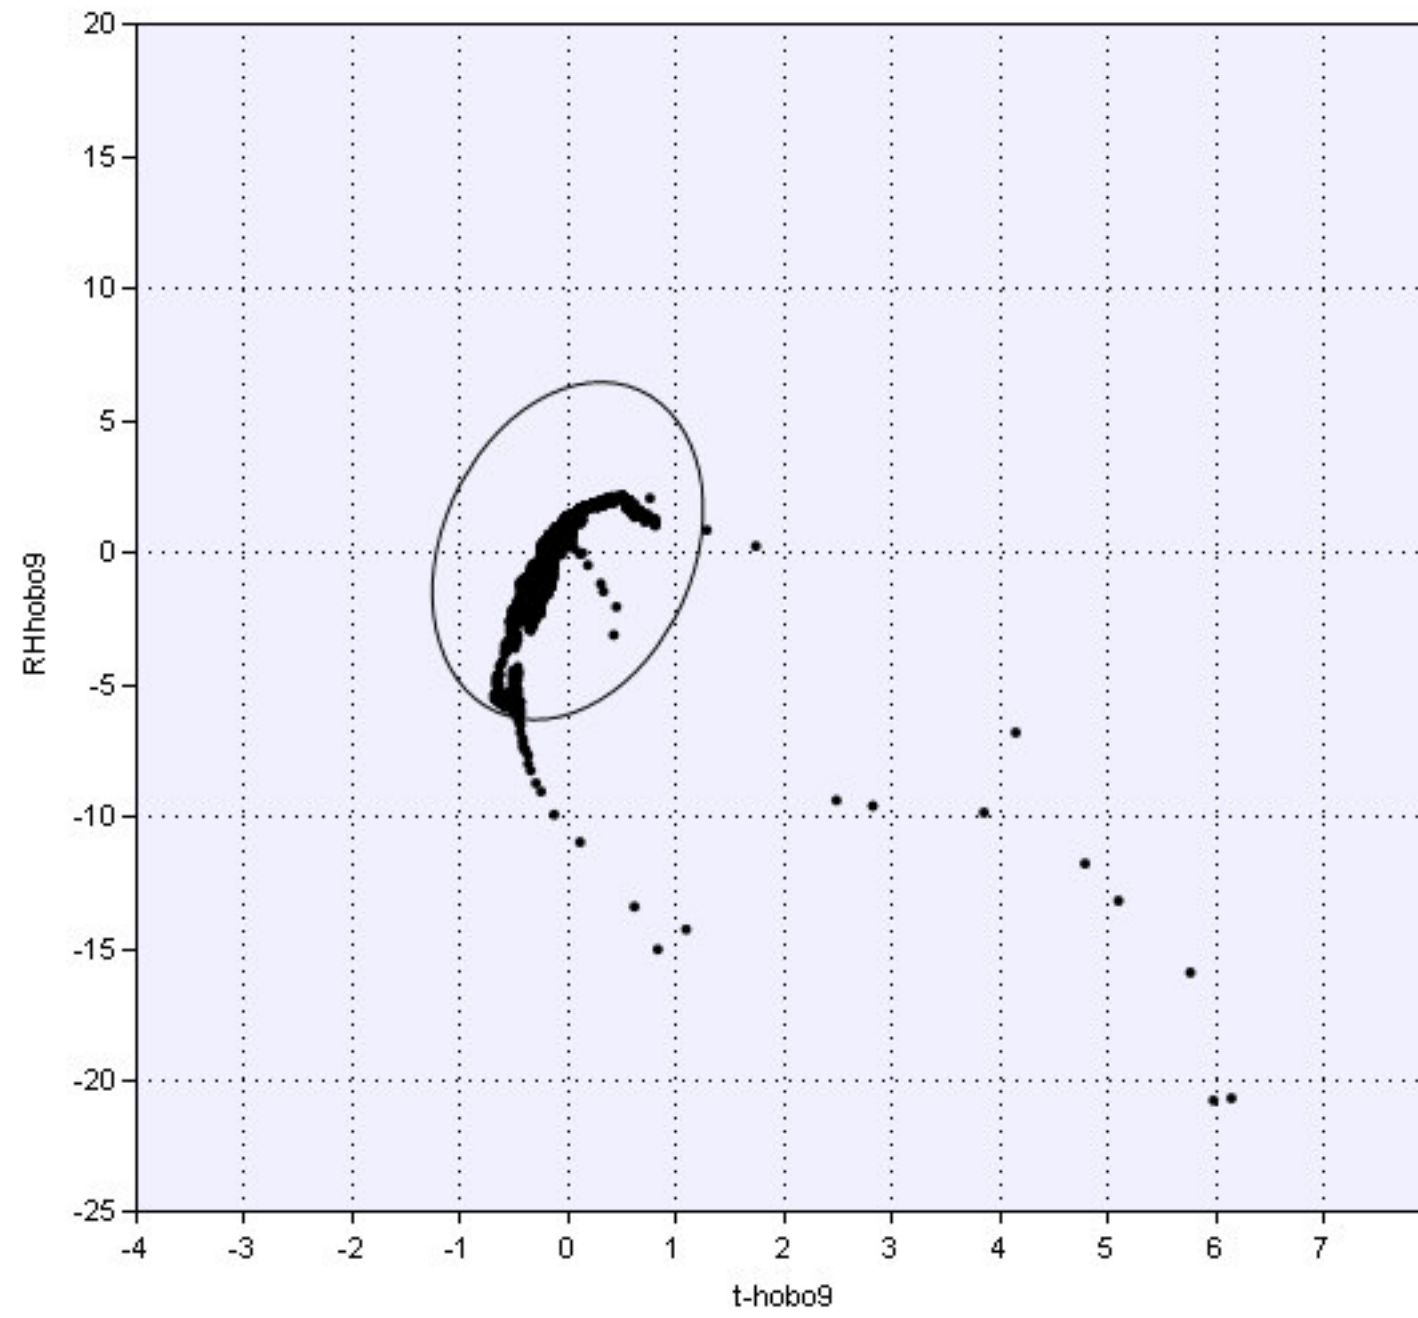

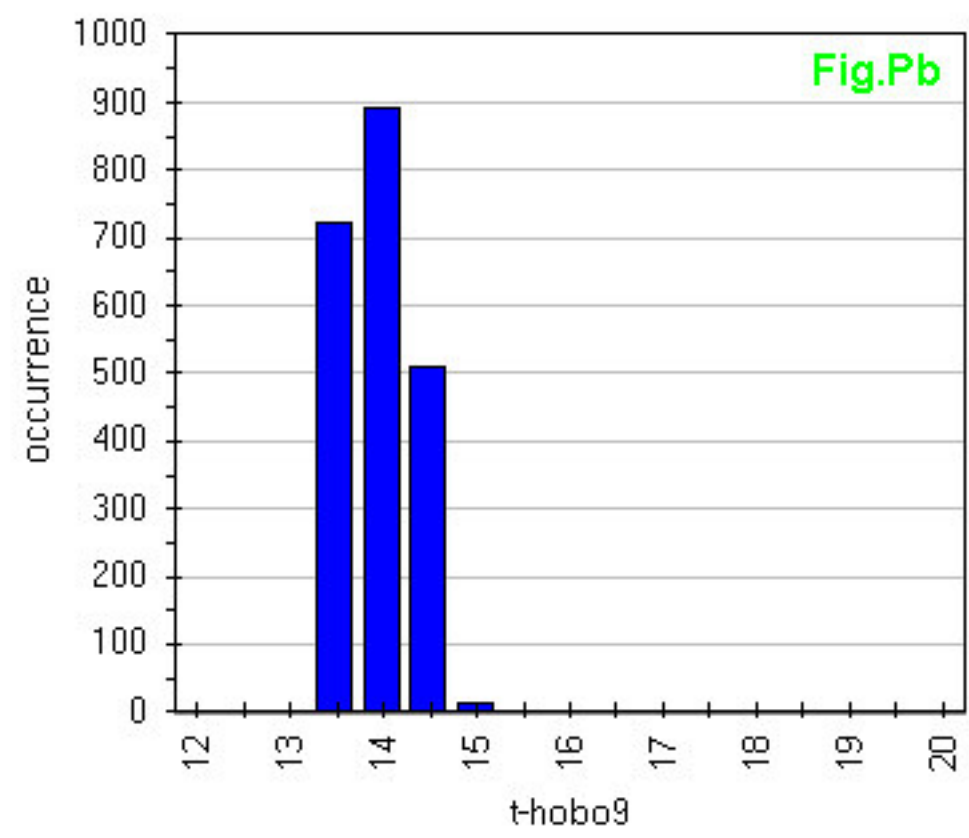

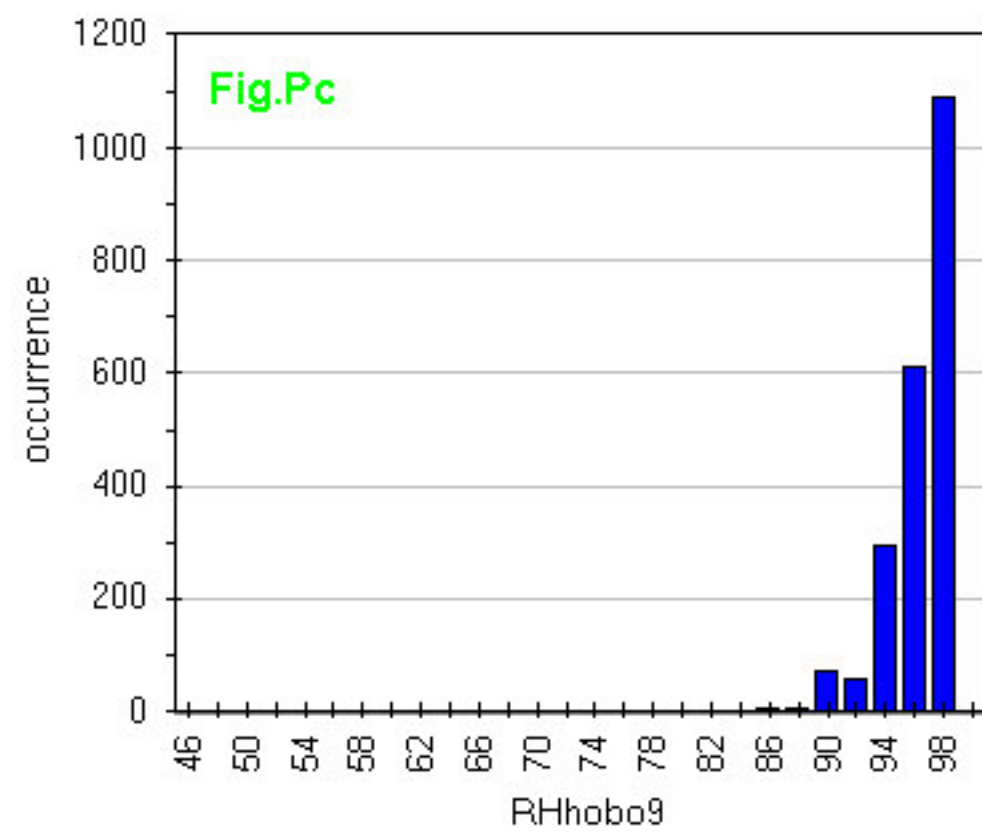

Fig.Qa

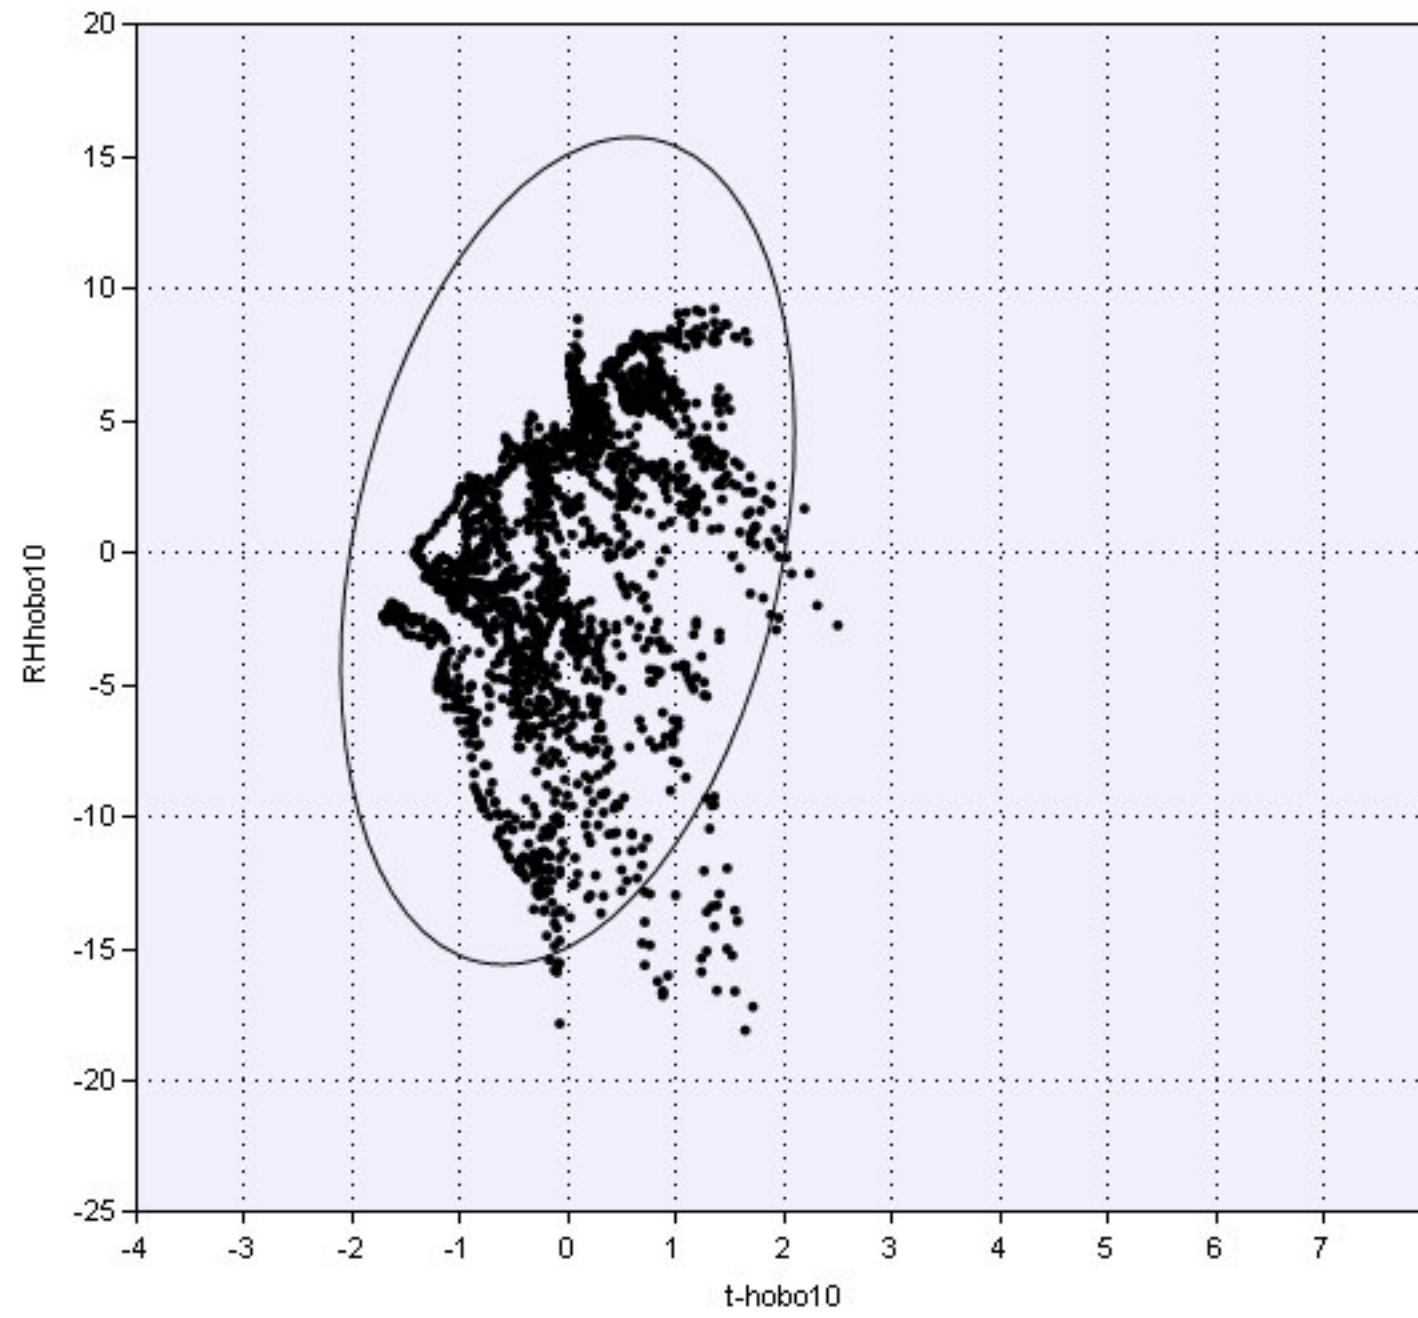

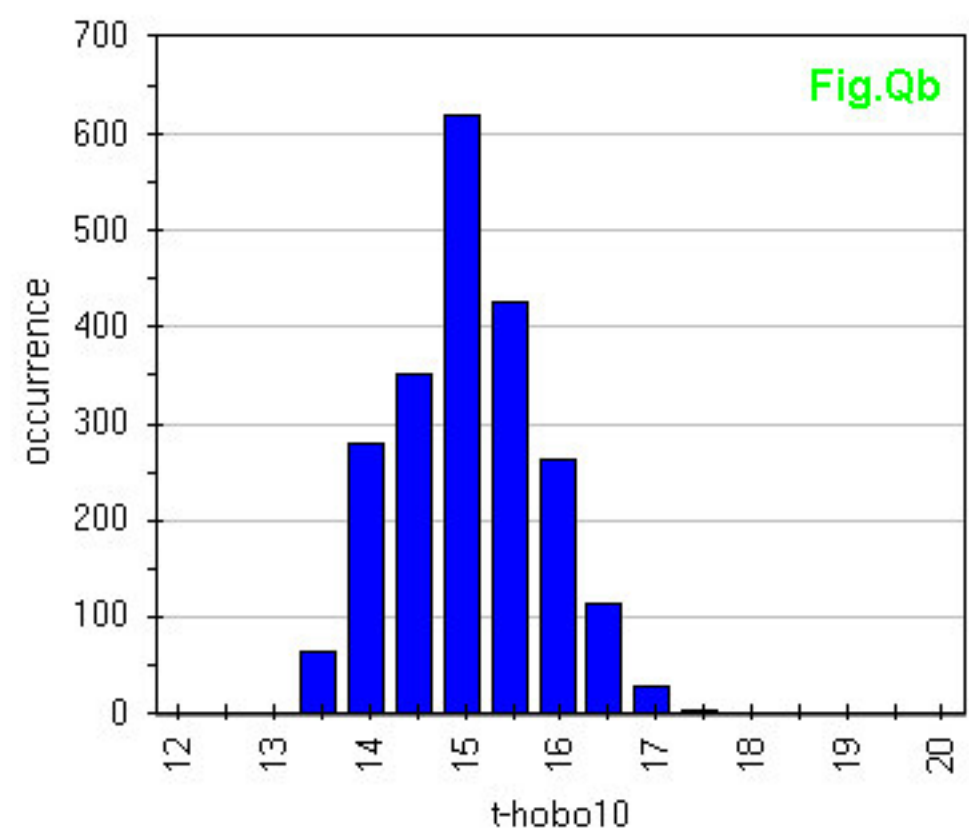

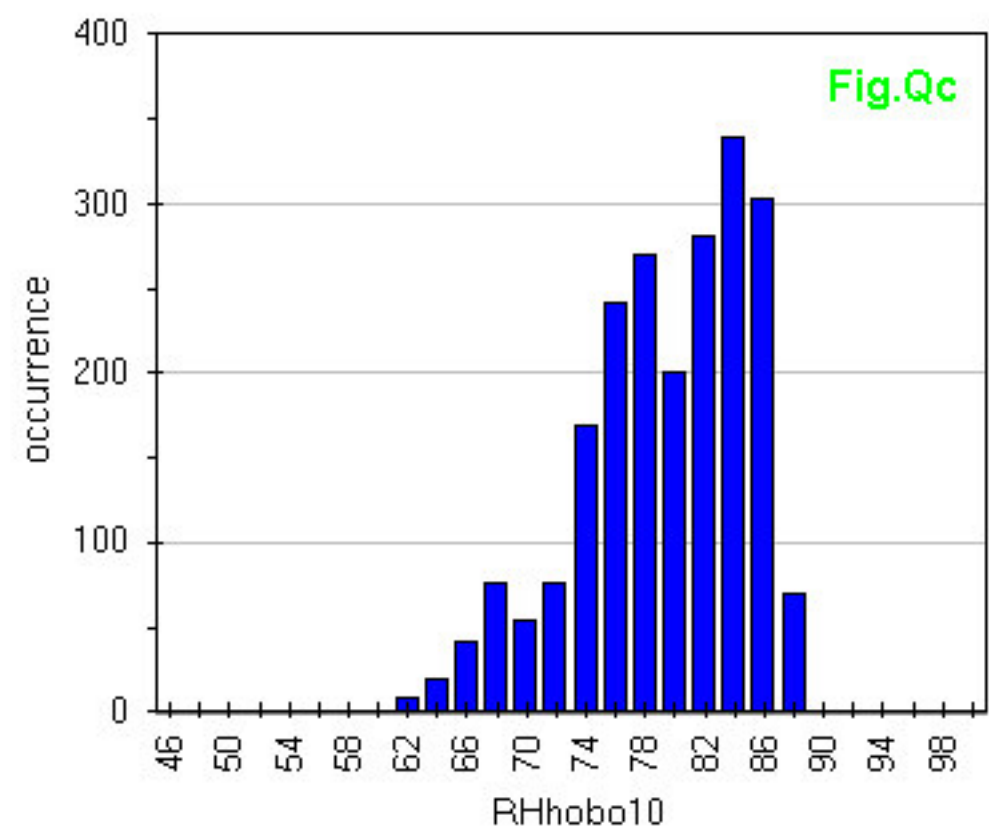

Fig.Ra

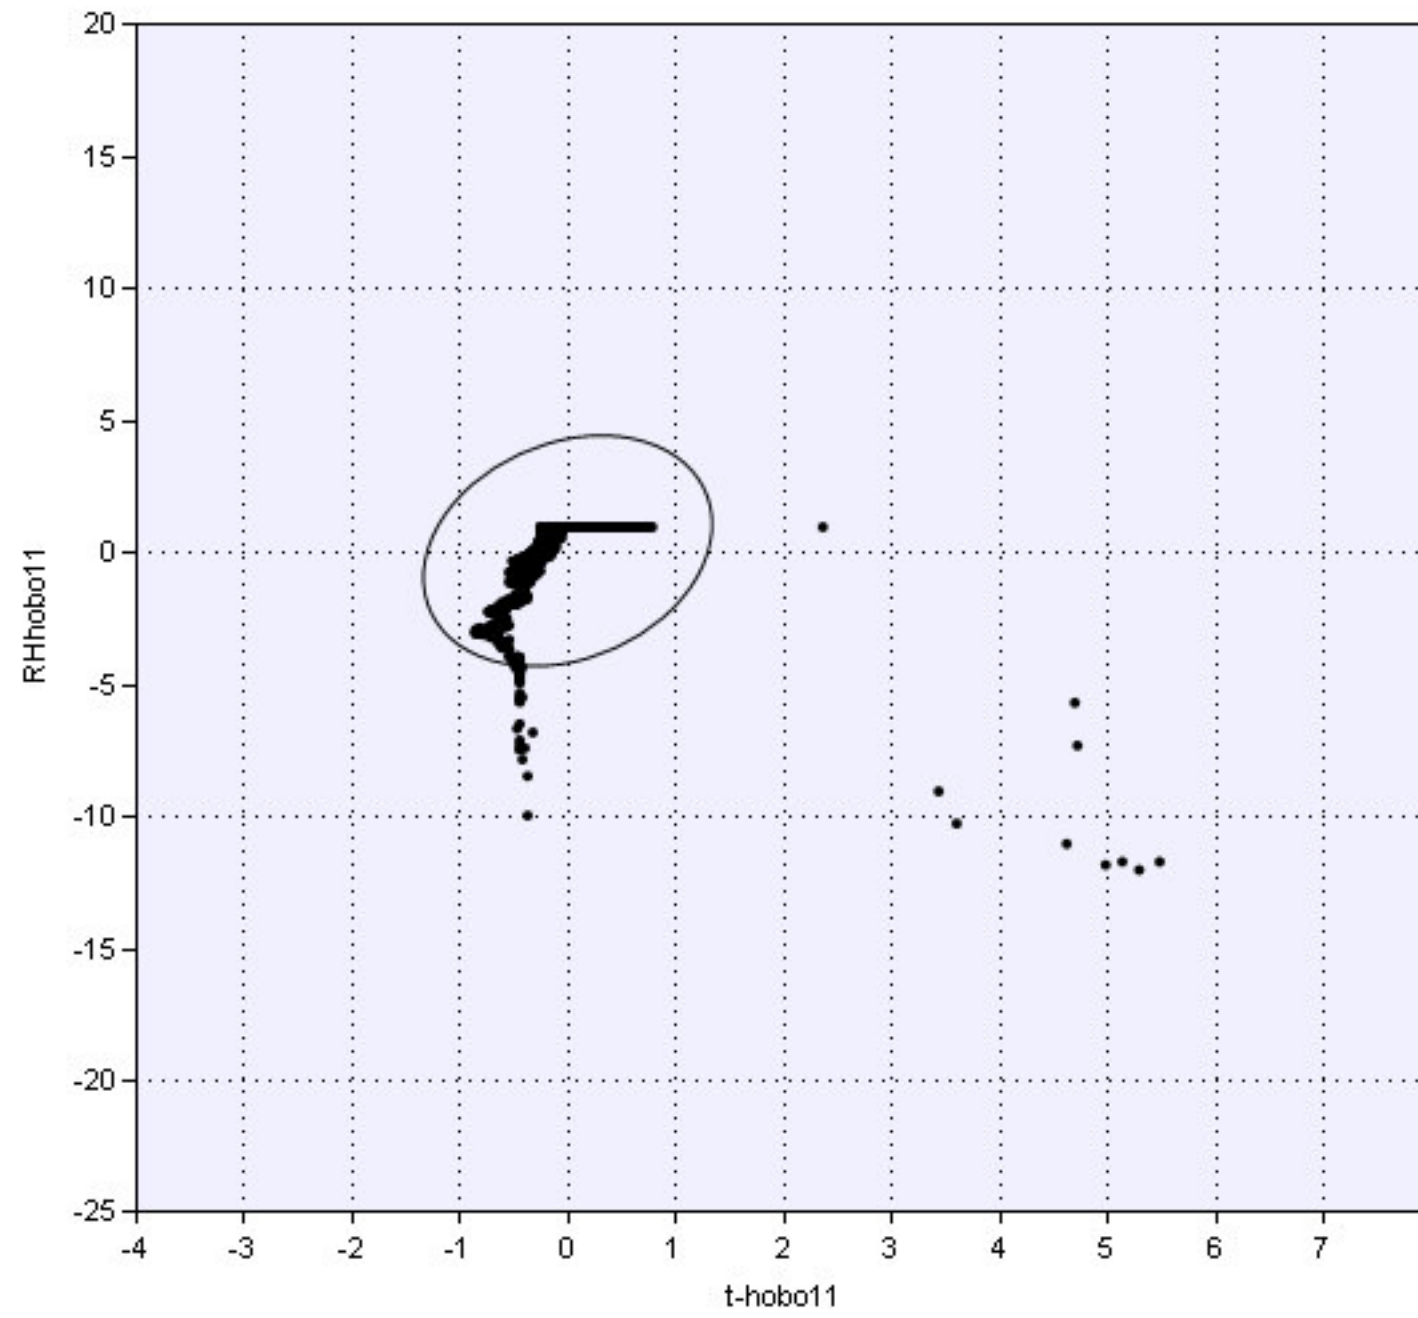



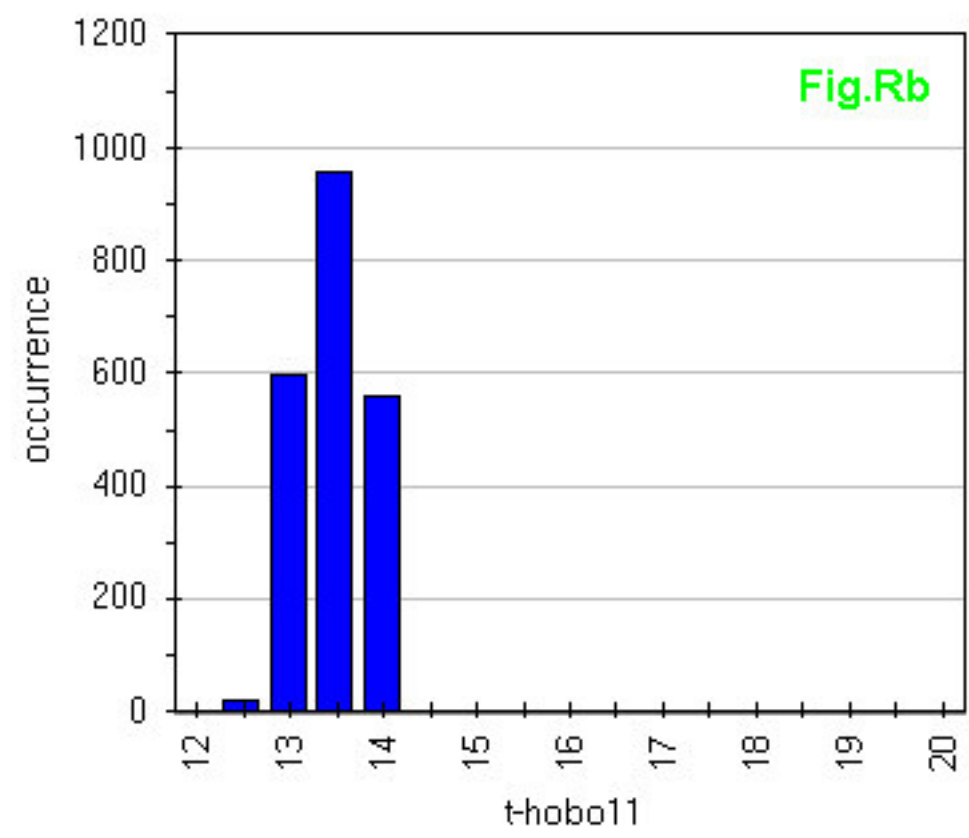

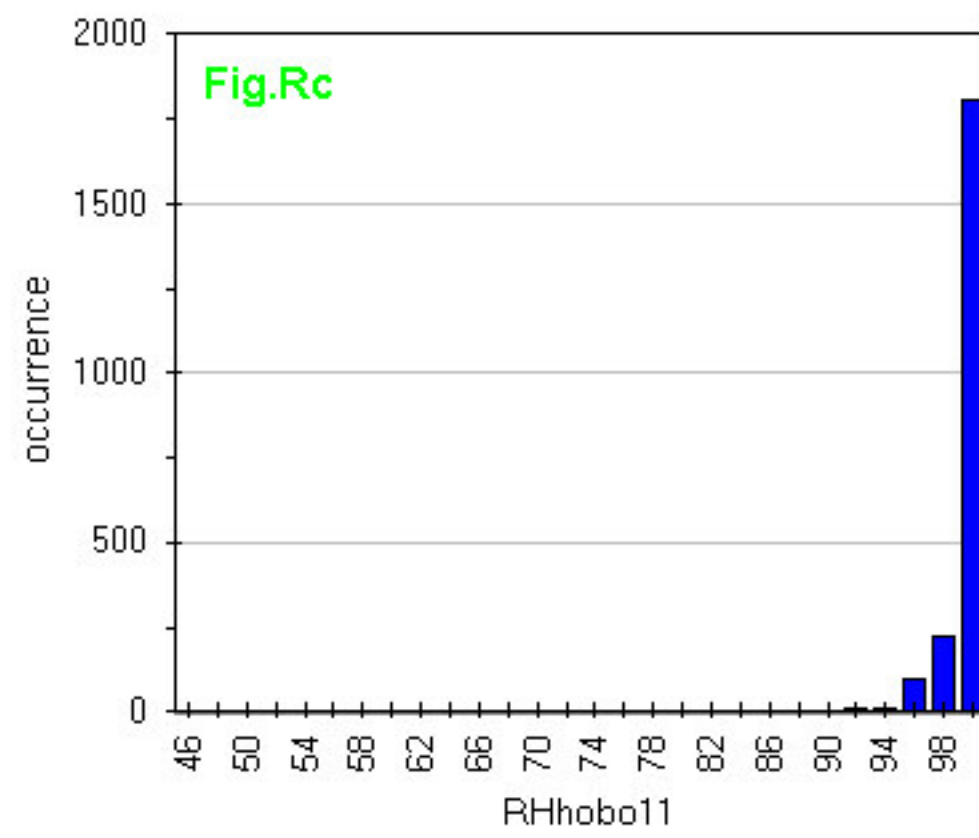

Fig.Sa

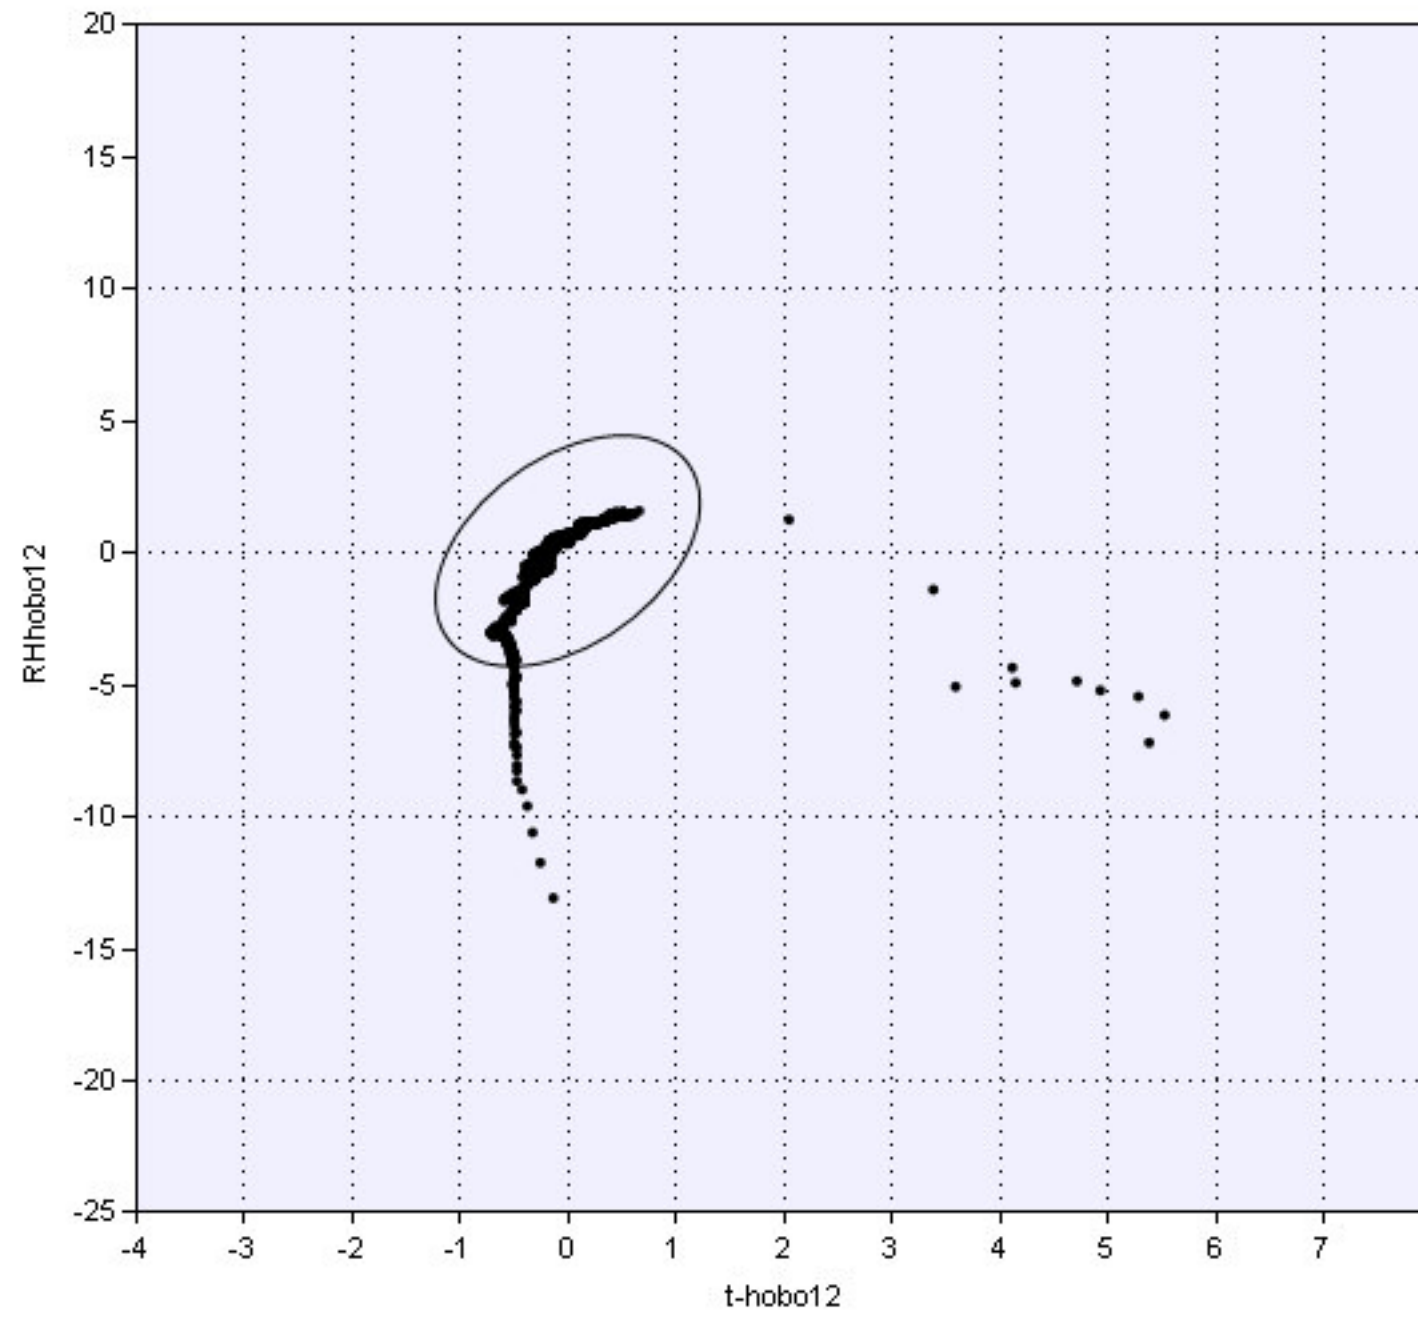

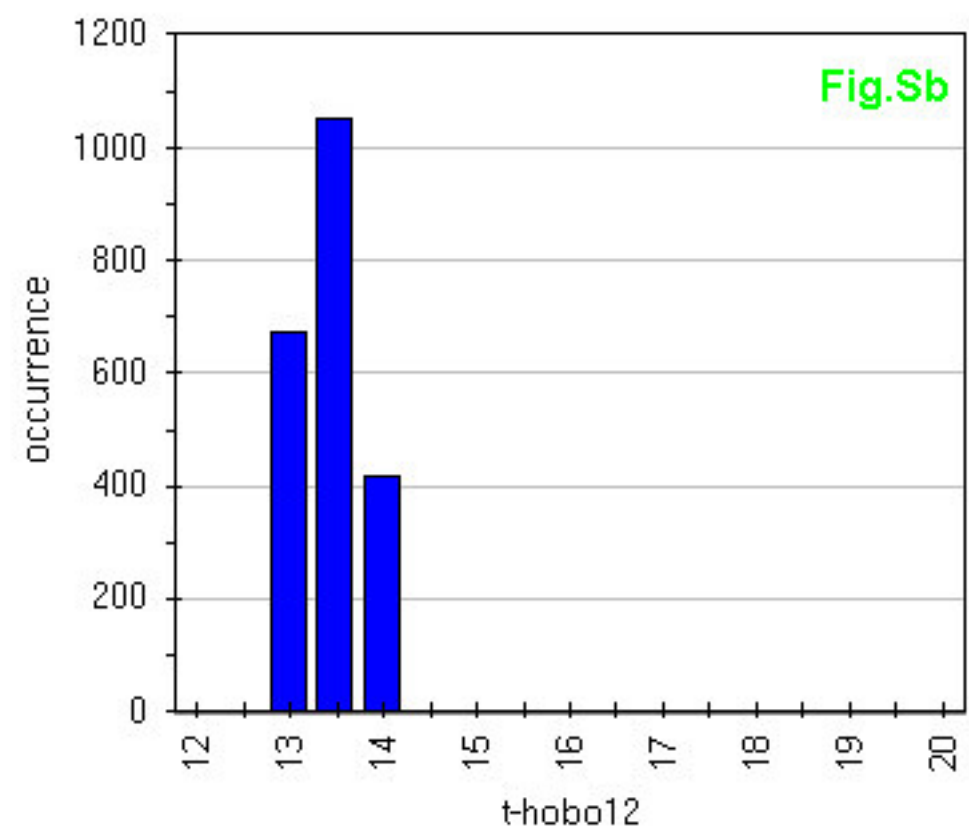

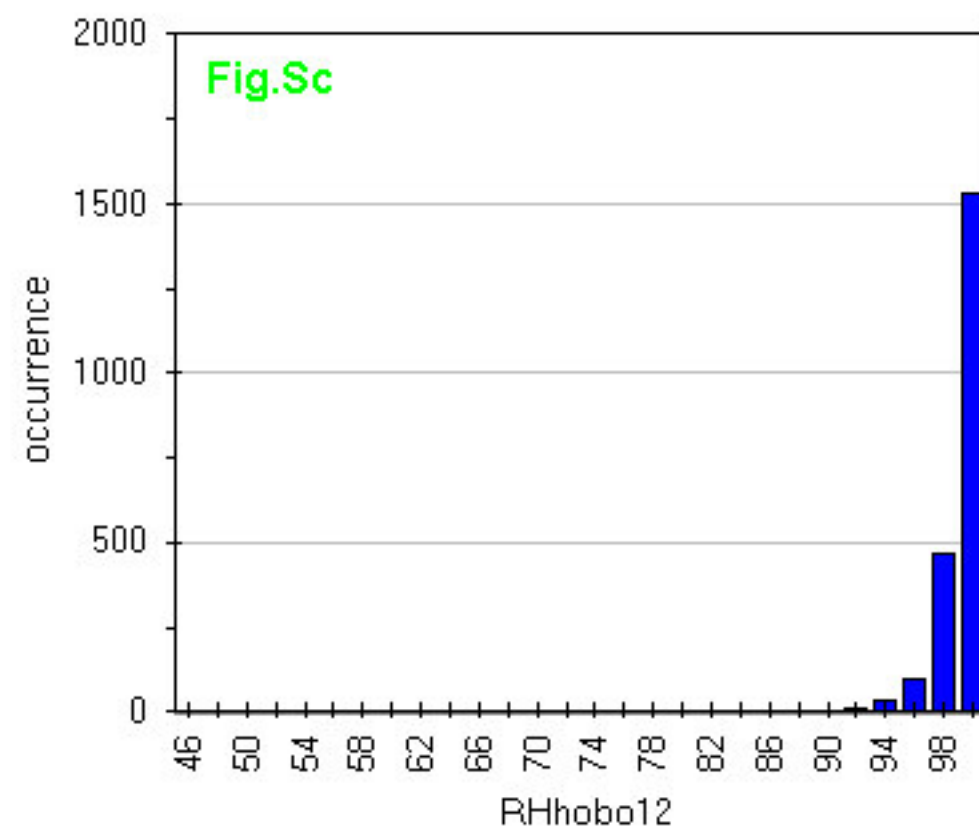

Fig.Ta

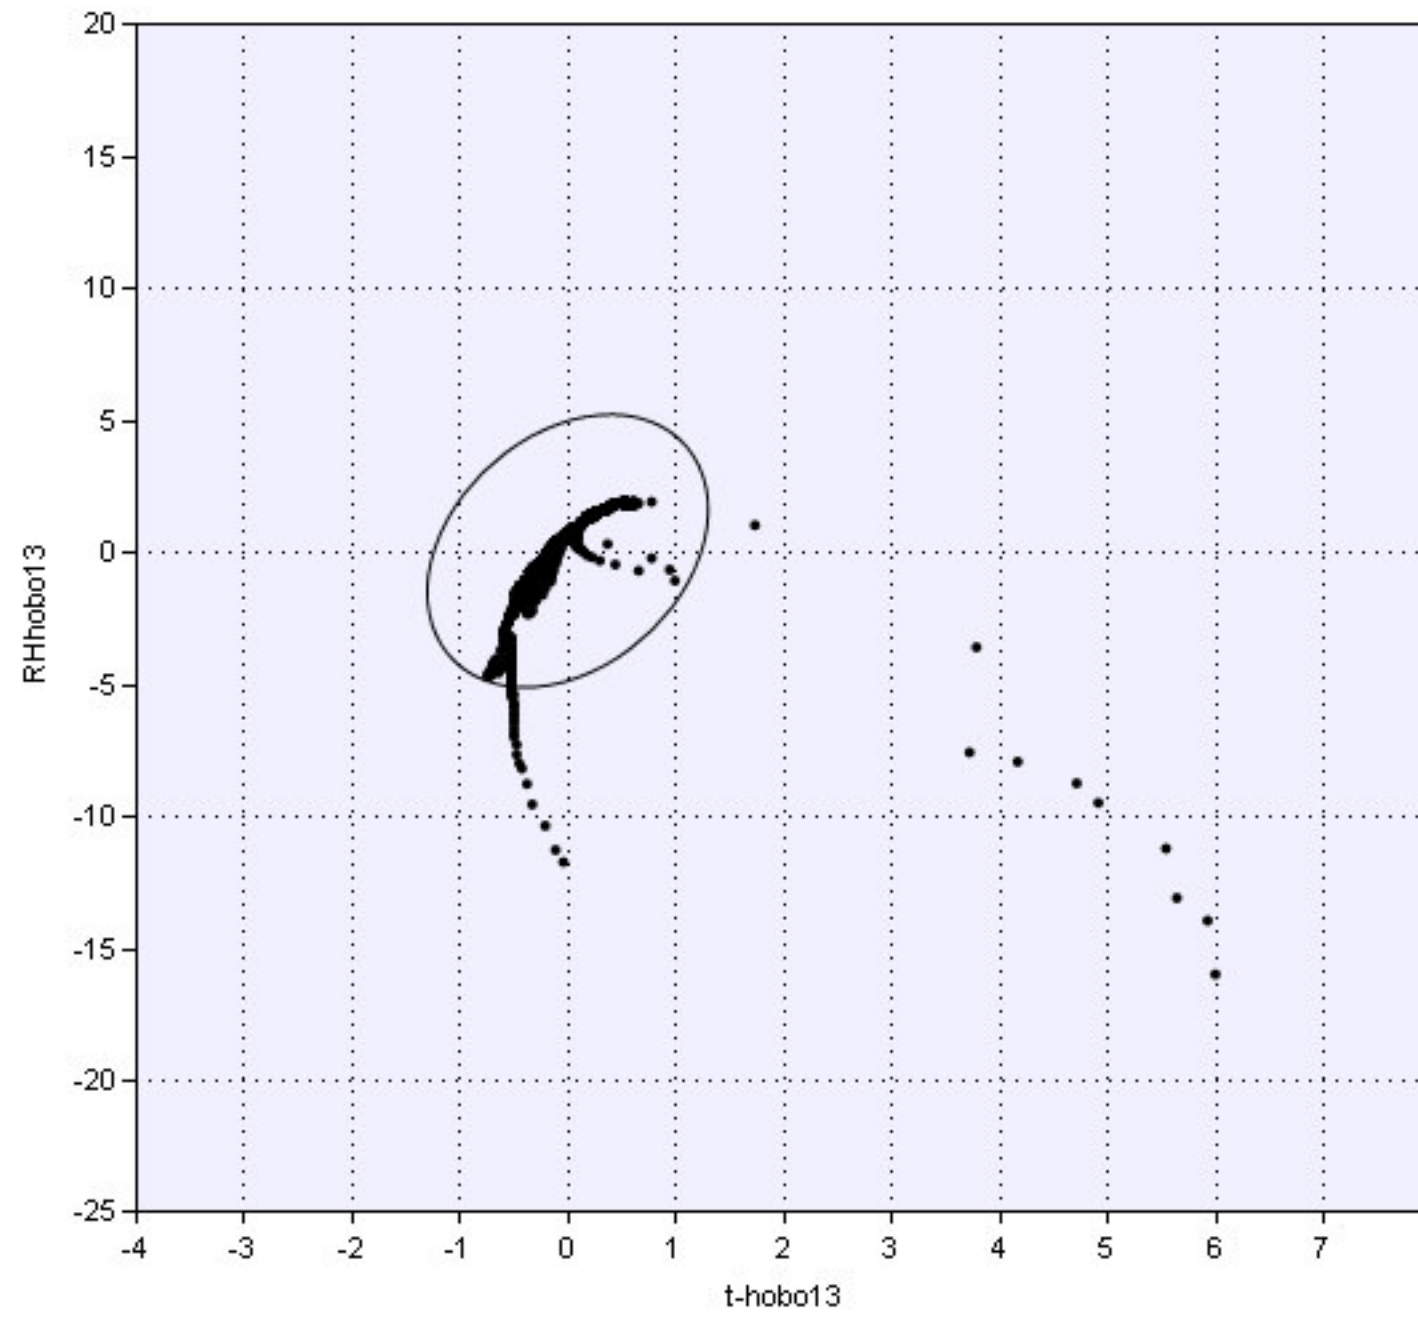

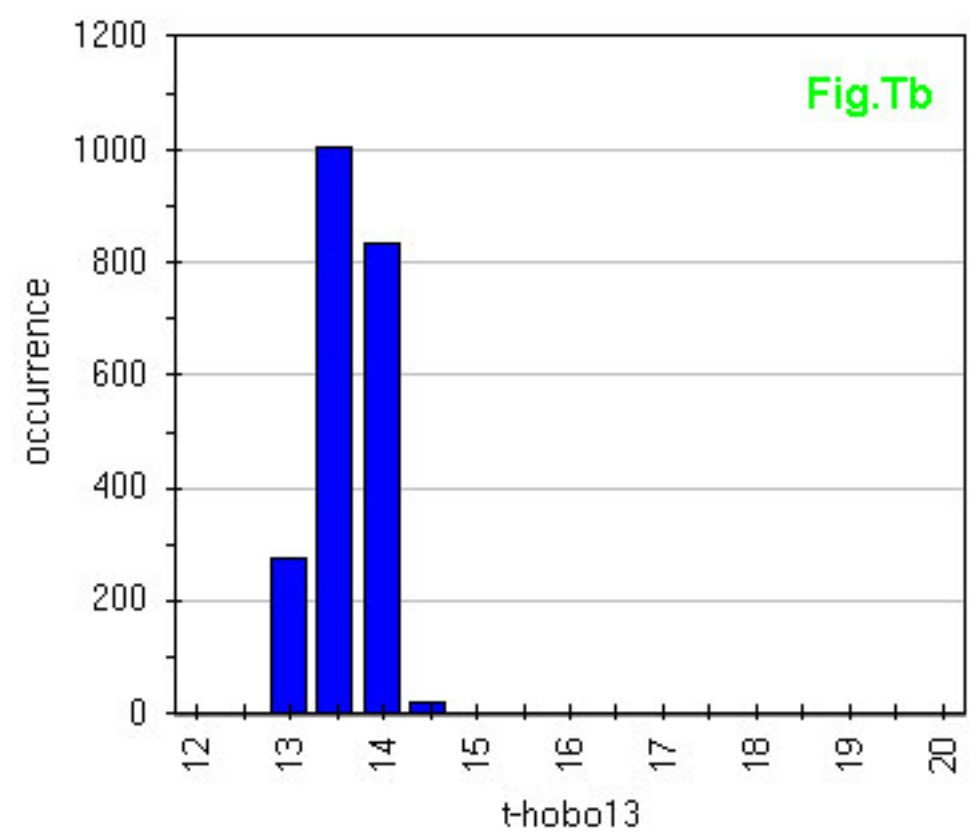

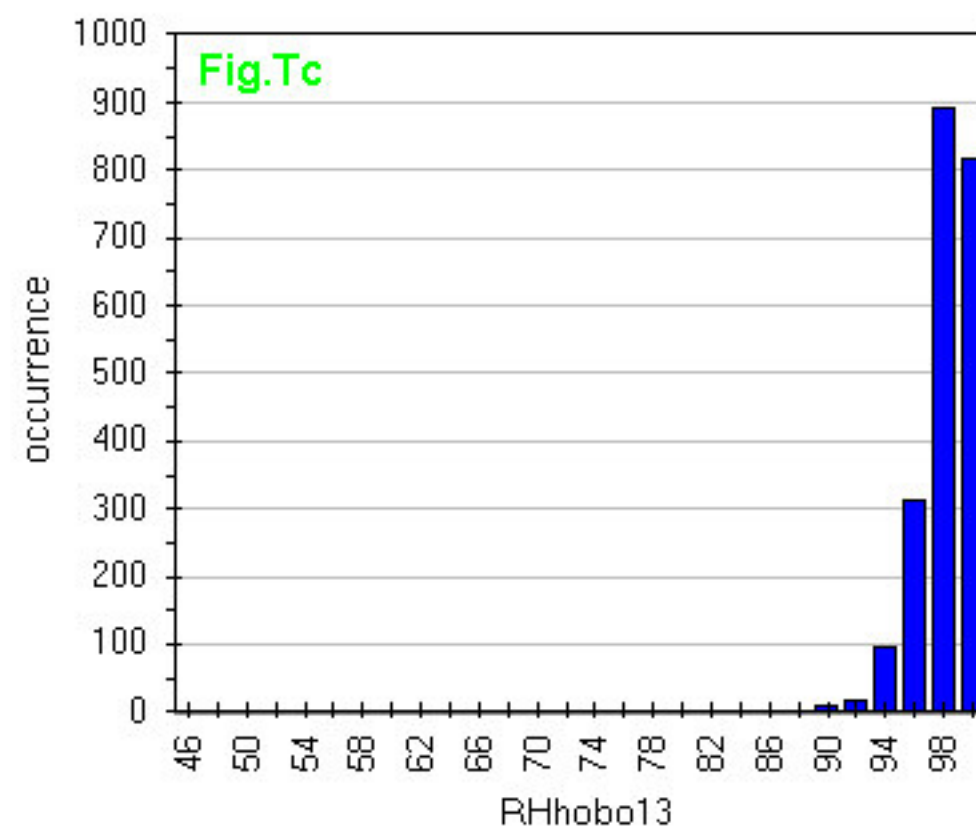



Fig.Ua

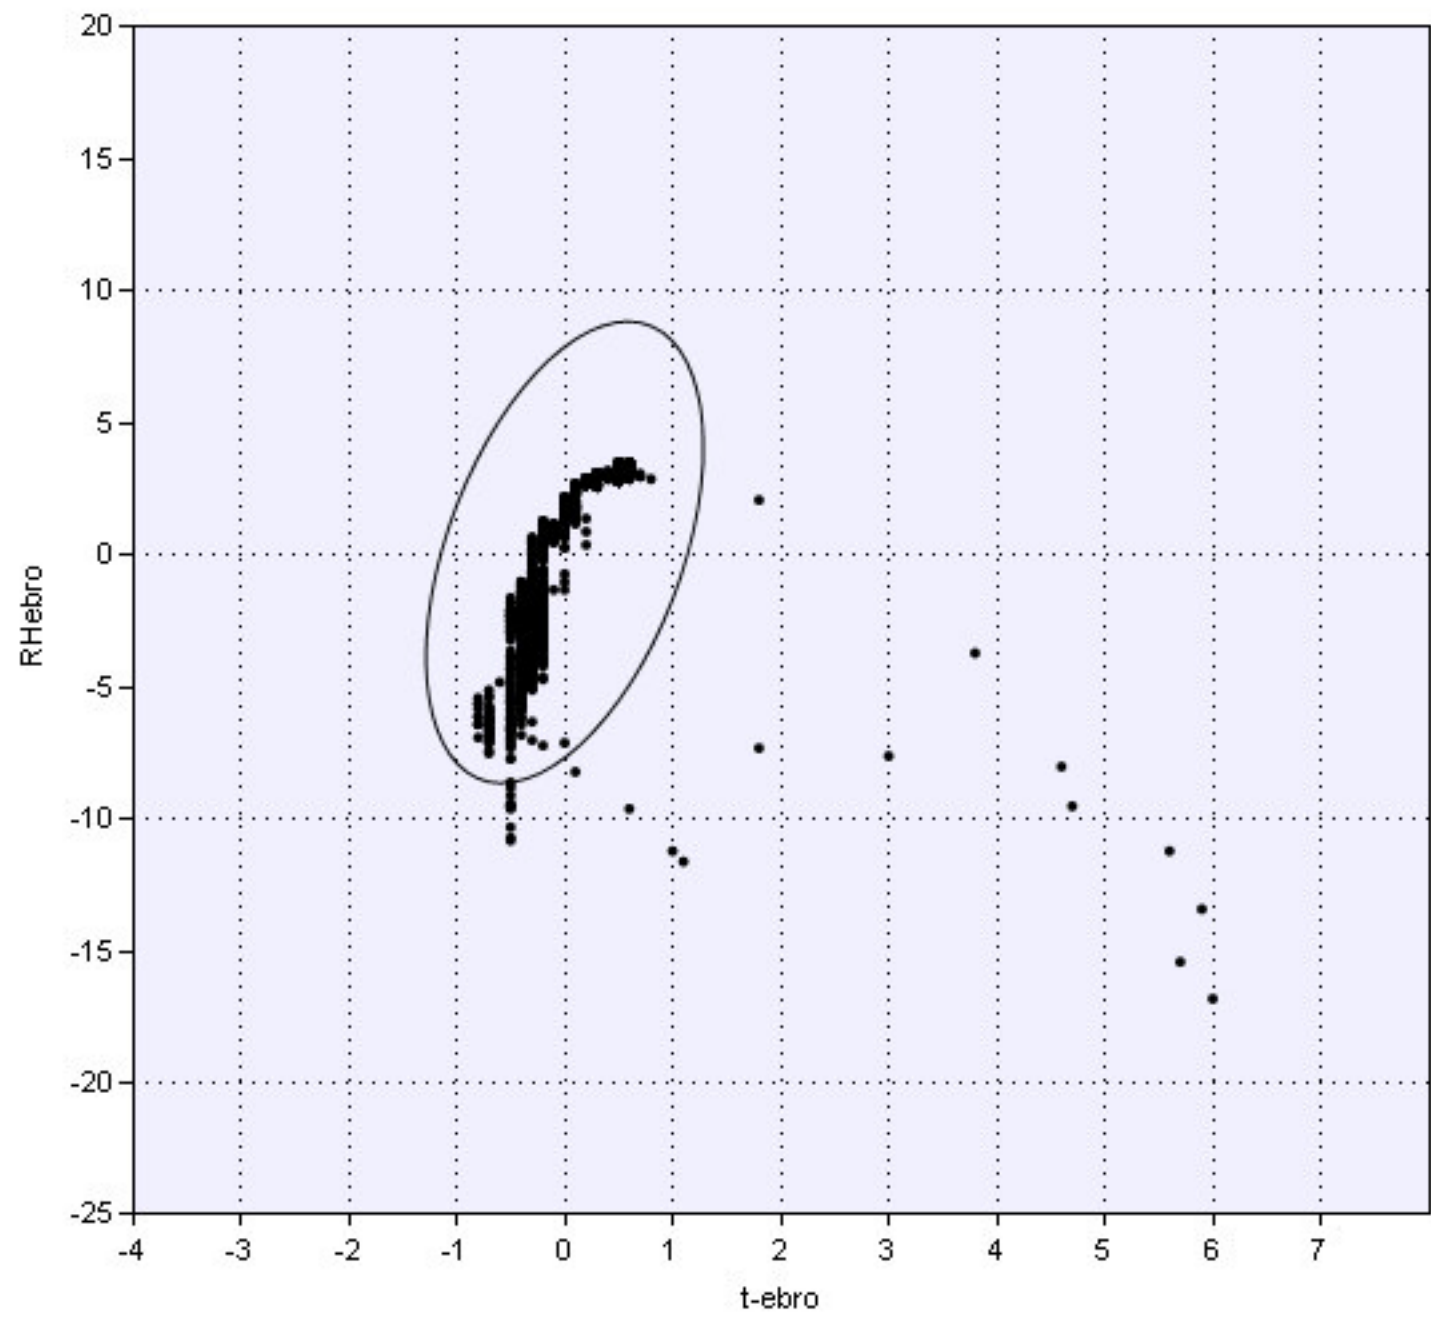

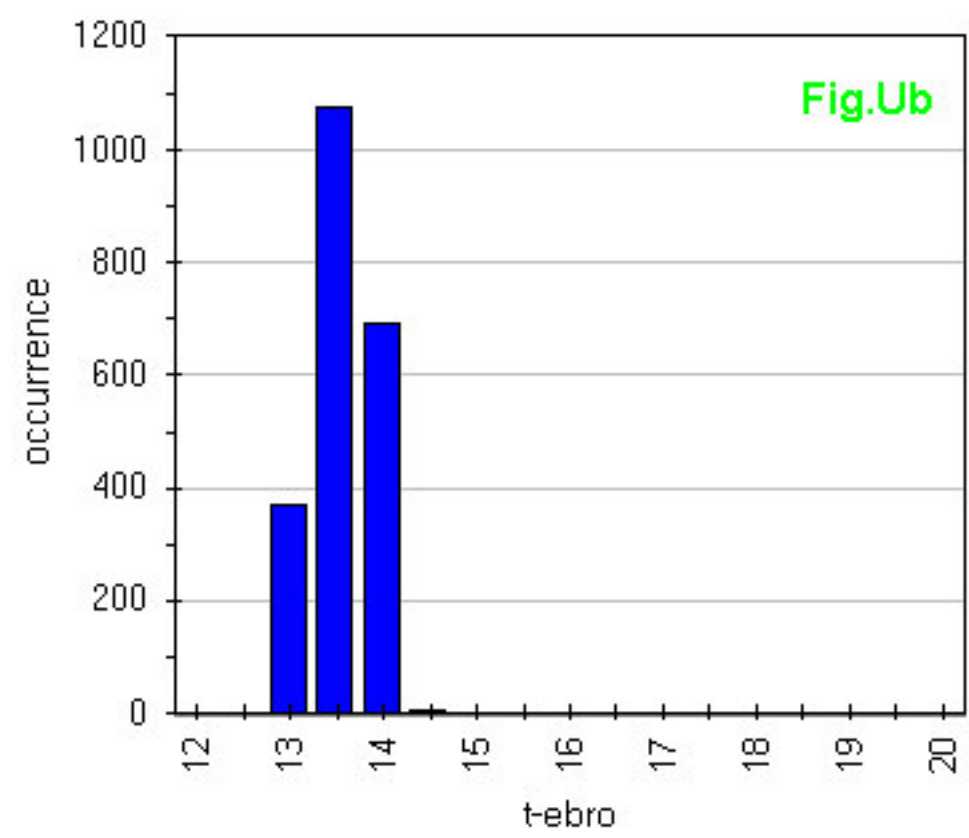

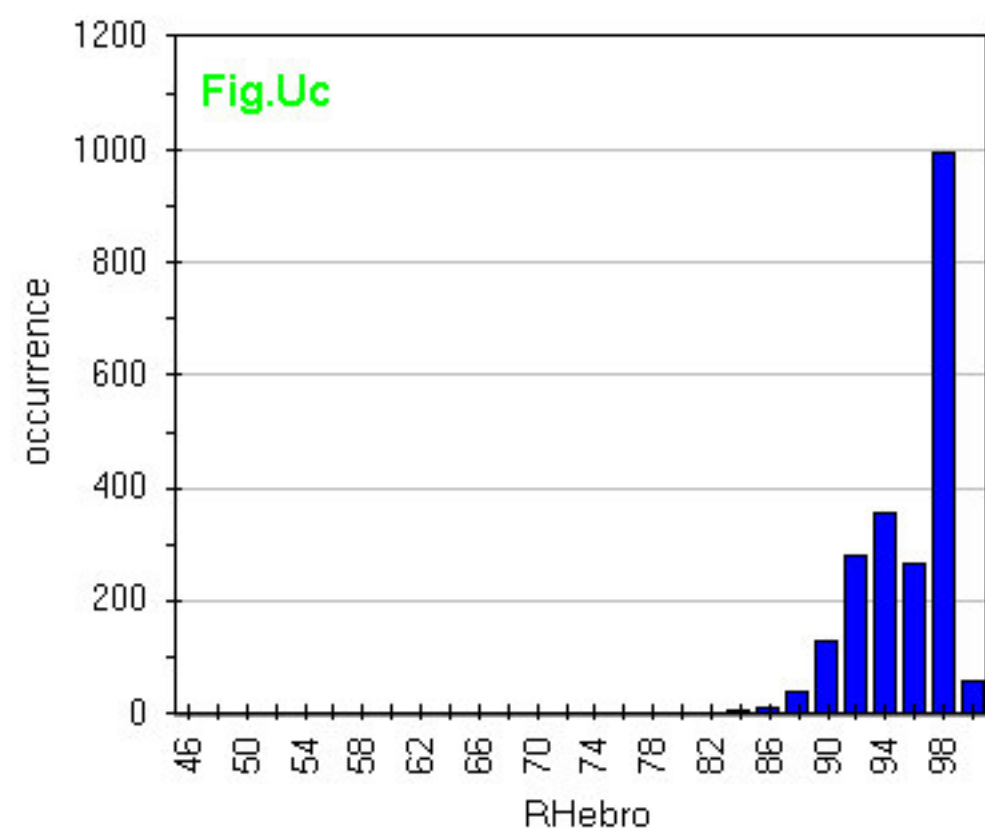

Fig.Va

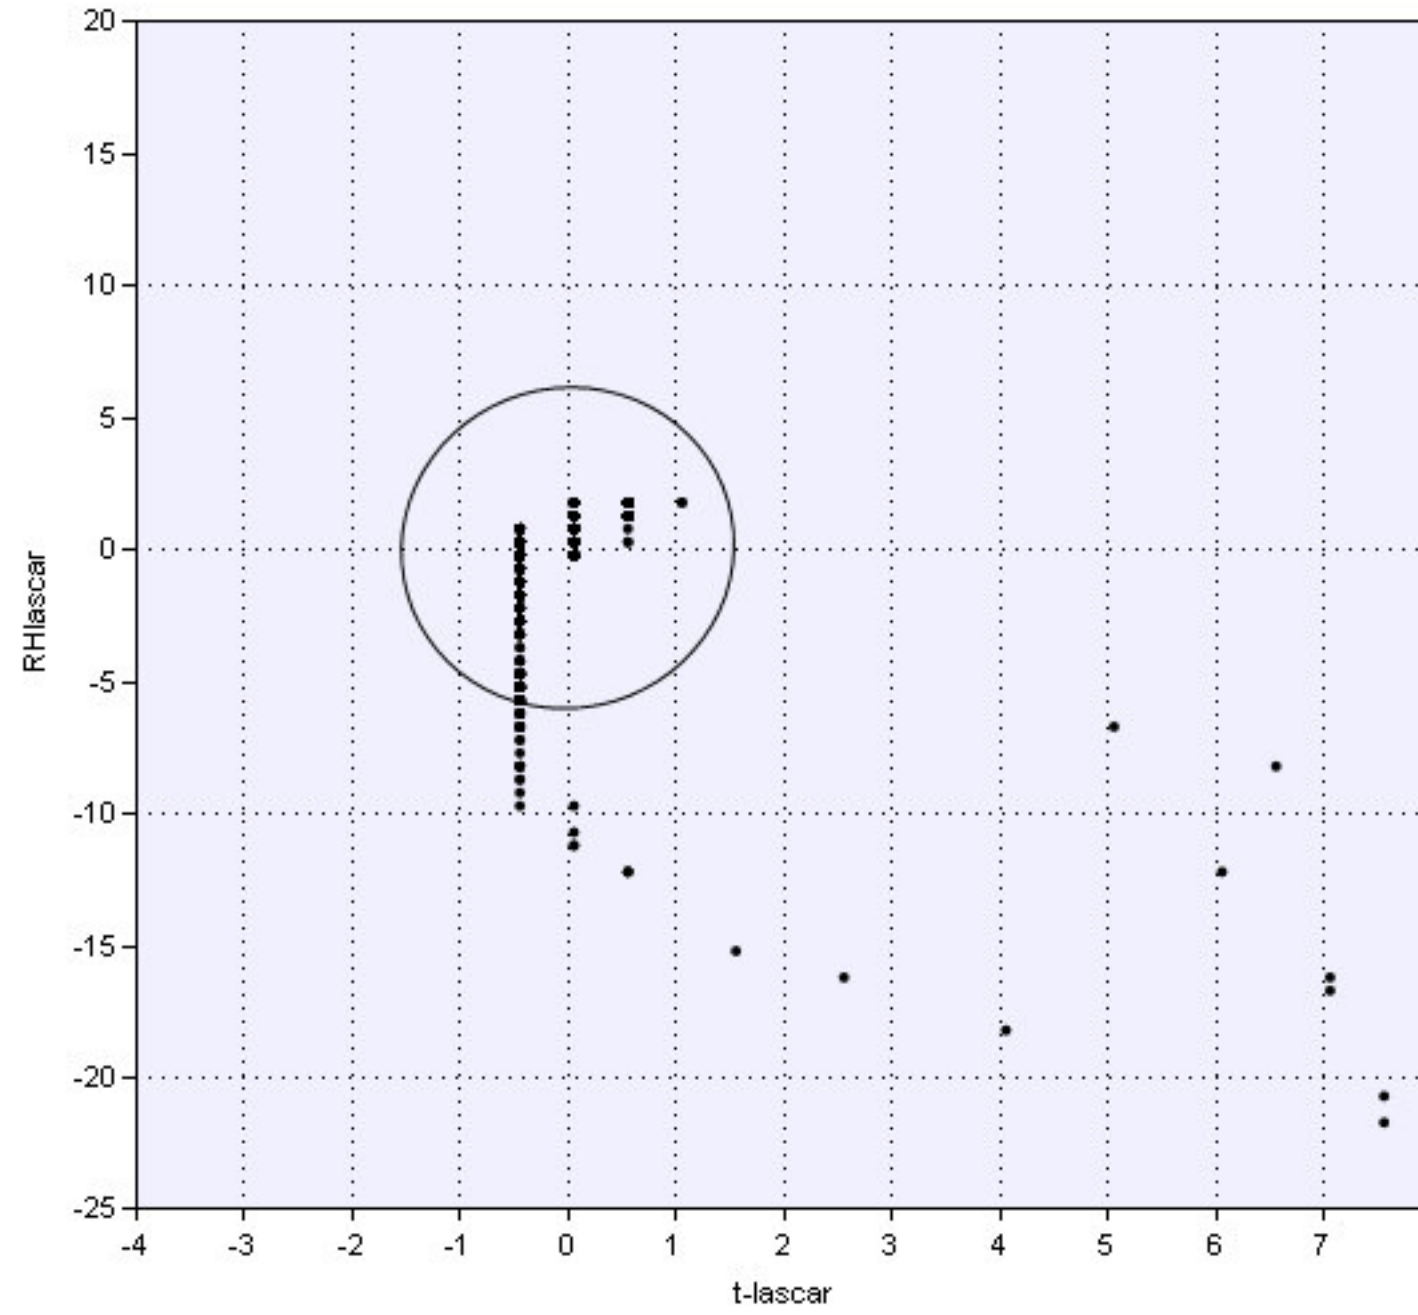

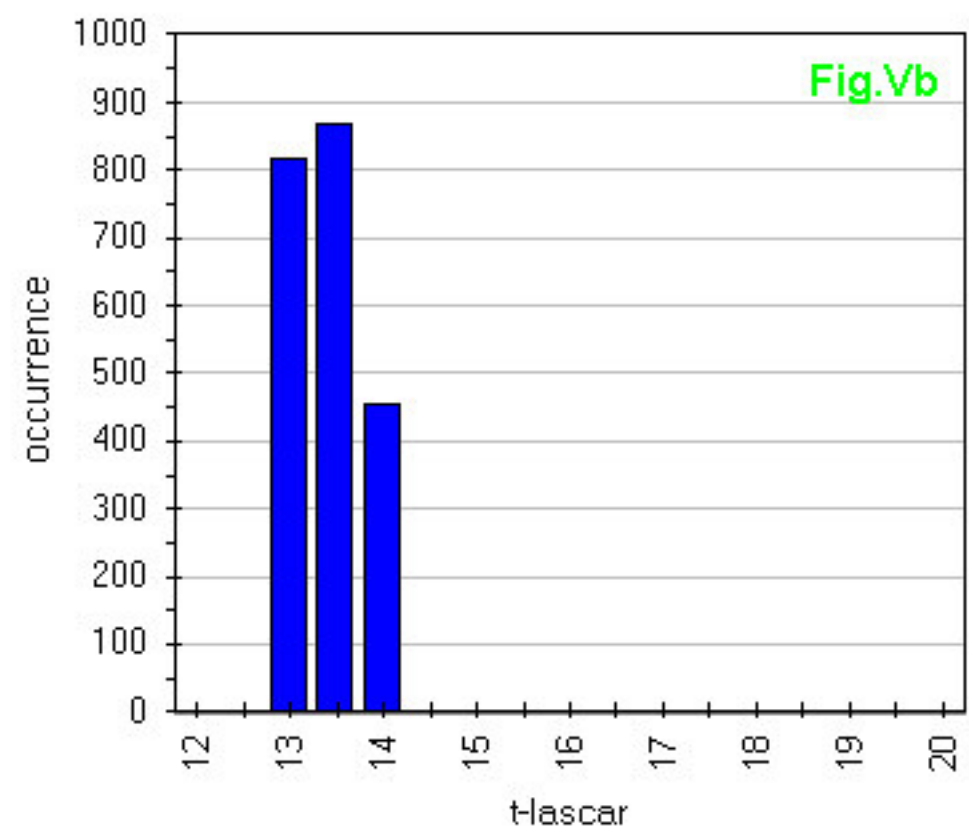

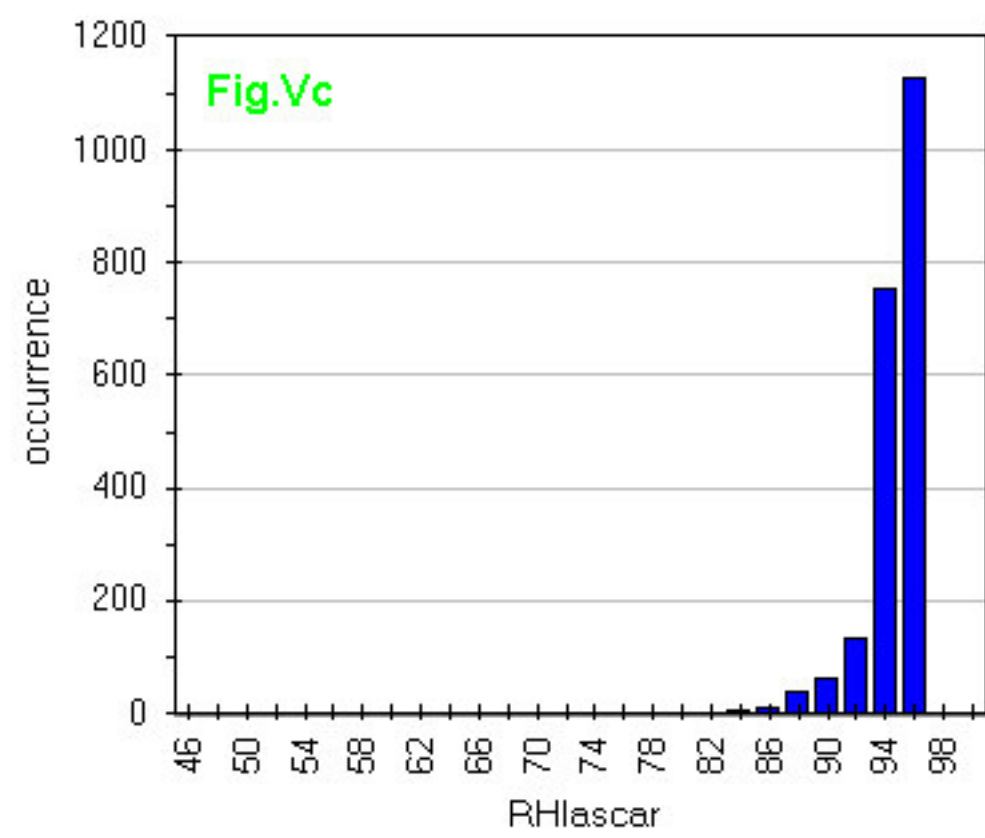

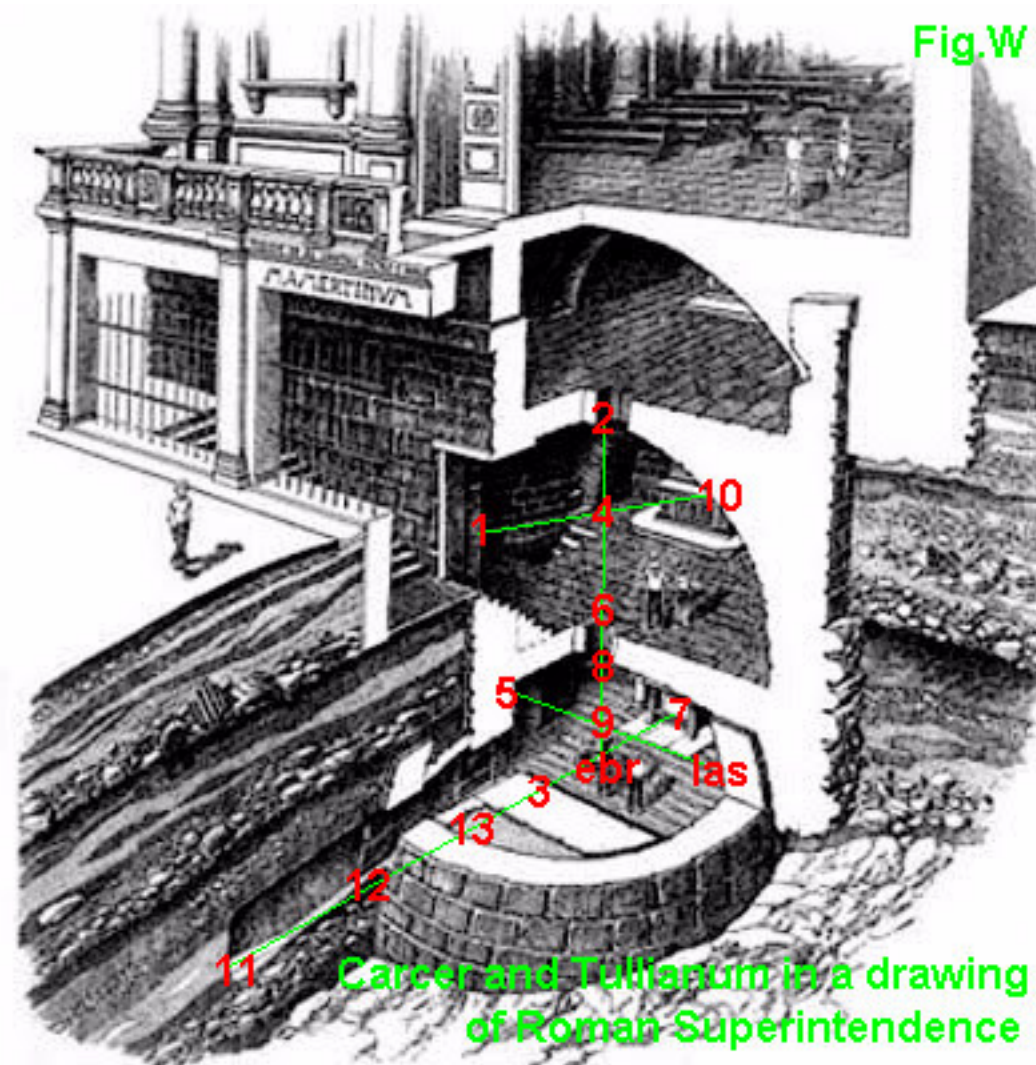

Fig.W

Carcer and Tullianum in a drawing of Roman Superintendence
